1 *Tudor domain containing protein 5-like (Tdrd5l)* identifies a novel germline granule that  
2 regulates maternal RNAs

3

4

5

6

7 Caitlin Pozmanter<sup>1</sup>, Sydney E Kelly<sup>1</sup>, Harrison Curnutte<sup>1</sup>, and Mark Van Doren<sup>1\*</sup>

8

9

10

11

12 <sup>1</sup>Department of Biology, Johns Hopkins University, 3400N Charles Street, Baltimore, MD, 21218

13

14

15 \*Corresponding author: [vandoren@jhu.edu](mailto:vandoren@jhu.edu)

16

17

18

19 Short title: Tdrd5l regulates maternally deposited RNAs

20

21 Key words: Tudor-domain, RNA Granule, germ cell, maternal RNA, *Drosophila*, Tdrd5l, Tdrd5

22

23

24 **Abstract**

25 Tudor domain-containing proteins are conserved across the animal kingdom for their important  
26 role in germline development and fertility. Previously, we demonstrated that *Tudor domain-*  
27 *containing protein 5-like (Tdrd5l)* plays an important role in the germline where it promotes  
28 male identity. However, Tdrd5l is also expressed in both the ovary and testis during later stages  
29 of germline development, suggesting that it may play a role in germline differentiation in both  
30 sexes. Through immunohistochemistry and genetic interaction assays we found that Tdrd5l  
31 localizes to a potentially novel germline RNA granule and plays a role in post-transcriptional  
32 gene regulation. RNA sequencing of *Tdrd5l* mutant ovaries compared to wild-type showed an  
33 enrichment for maternally deposited RNAs in differentially expressed genes. Additionally,  
34 embryos laid by *Tdrd5l*-mutant females exhibited reduced viability and displayed dorsal  
35 appendage defects suggesting a failure of proper dorsal-ventral patterning. We also observed  
36 defects in posterior localization of the *oskar* mRNA and protein, as well as Kinesin-LacZ, which  
37 indicate defects on anterior-posterior polarization of the oocyte. As both A/P and D/V  
38 patterning are dependent on *gurken*, we examined Grk expression during oogenesis. We  
39 observed premature accumulation of Gurken (Grk) protein, as well as a translational regulator  
40 of Grk, Oo18 RNA-Binding Protein (Orb or CPEB), in nurse cells, indicating that translation of  
41 these proteins is no longer properly repressed during mRNA transport to the oocyte. We also  
42 found that decreased *orb* function suppressed the *Tdrd5l*-mutant phenotype, and so defects in  
43 Orb are likely a primary cause of the defects in *Tdrd5l* mutants. Our data indicate that *Tdrd5l* is  
44 important for translational repression of maternal mRNAs such as *orb*, and possibly others,

45 following their synthesis in the nurse cells and during their transport and subsequent activation  
46 in the oocyte.

47

#### 48 **Author Summary**

49 Across the animal kingdom, Tudor-domain containing proteins are important for germline  
50 development, gametogenesis and fertility. One important aspect of oogenesis is the post-  
51 transcriptional regulation of maternal mRNAs that must be translationally repressed prior to  
52 their activation at the correct time and place in the oocyte or early embryo. In this study we  
53 show that *Drosophila Tudor-domain containing protein 5-like (Tdrd5l)* is important for post-  
54 transcriptional regulation of maternal mRNAs. Tdrd5l localizes to an apparently new type of  
55 RNA granule in the germline and interacts with post-transcriptional regulation pathways.  
56 Embryos from *Tdrd5l*-mutant mothers exhibit patterning defects and lethality. We observe  
57 premature accumulation of the important embryonic patterning factor Gurken (Grk/EGF) in  
58 nurse cells during oogenesis. Grk is known to be regulated by a cytoplasmic polyadenylation  
59 element binding protein (CPEB) called Orb (Oo18 RNA-Binding Protein), and we also observe  
60 premature accumulation of Orb in nurse cells in *Tdrd5l* mutants. Decreased *orb* function  
61 suppresses the *Tdrd5l*-mutant phenotype, indicating that this is a primary defect in these  
62 mutants. Our data indicate that the “Tdrd5l Granule” is important for post-transcriptional  
63 regulation of maternal mRNAs such as *orb*, leading to their repression until they are required in  
64 the oocyte or early embryo.

65

66

## 67 **Introduction**

68 Tudor domain-containing proteins are conserved across the animal kingdom, and one  
69 important function of these proteins is germline specification and maintenance (1). Mutations  
70 in the genes for Tudor proteins have been shown to cause infertility in flies and mammal alike  
71 (2,3). While the molecular function of a tudor domain is to promote protein-protein interaction  
72 by binding to dimethylated arginine and lysine residues (4,5), many tudor domain-containing  
73 proteins also have additional domains such as RNA recognition motifs (6). Together this allows  
74 for tudor domains to scaffold larger protein and ribonucleoprotein complexes (RNPs) such as in  
75 RNA granules.

76 RNA granules allow for multiple modes of RNA regulation in locally concentrated and  
77 protected membrane-less organelles (7). One germline specific granule that is enriched for  
78 tudor domain-containing proteins is the nuage (8–10), which produces piRNAs that silence  
79 transposons (11). In addition to the nuage, germ cells have a number of other types of granules  
80 that can also be found in other tissues, the most common of which are the processing bodies  
81 (P-bodies) (12). These granules can take on different functions all centered around post-  
82 transcriptional regulation of mRNAs such as inducing mRNA degradation via removal of the 5'  
83 cap and translational repression via regulation of the poly(A) tail. mRNAs are often targeted to  
84 P-bodies through binding of miRNAs which leads to the formation of a protein complex around  
85 the RNA (13,14). RNA granules are particularly important in the germline where RNAs are often  
86 transcribed at a different time or place from their translation (15). mRNAs can be sent to these  
87 granules for repression until they are needed for translation or to be repressed during transport

88 to another location (16). In these granules germ cell RNAs can also associate with proteins to  
89 form an RNP that targets RNA localization.

90 One special class of germline RNAs are the maternal RNAs generated during oogenesis  
91 and deposited into the oocyte that are essential for early embryonic development, in particular  
92 before activation of the zygotic genome (17). During *Drosophila* oogenesis, maternal RNAs are  
93 transcribed in nurse cells and then transported into the oocyte where they are later translated.  
94 While in the nurse cells, maternally deposited RNAs stay translationally silenced through  
95 mechanisms that are not totally understood (18). Some of these RNAs become localized to  
96 specific regions of the oocyte and act to establish the body axes of the embryo. *gurken* (*grk*) is  
97 translated first at the posterior of the oocyte to specify posterior fate before localizing to the  
98 dorsal-anterior corner of the oocyte to specify dorsal fate (19–21). Other important RNAs  
99 include *oskar* (*osk*), which localizes to the posterior to help specify posterior identity and the  
100 germline (22) (23) and *bicoid* (*bcd*), which specifies the anterior (24).

101 Previous work in our lab identified a novel tudor domain-containing protein Tdrd5l  
102 (Tudor domain-containing protein 5-like) during a screen for genes involved in germline sex  
103 determination (25). Tdrd5l is homologous to mouse Tdrd5 as well as to another *Drosophila*  
104 protein, Tejas, both of which are required for fertility (10,26). All of these proteins have a highly  
105 related tudor domain, while Tejas and mouse Tdrd5 also have LOTUS domains that interacts  
106 with the RNA helicase Vasa (27). *Drosophila* Tejas and mouse Tdrd5 both localize with Vasa to  
107 the nuage where they act in piRNA synthesis and retrotransposon repression (10,26).

108 Unlike its closest homologs, Tdrd5l does not localize to the nuage. Further, while Tdrd5l  
109 is male-specific in the early germline, it is expressed in differentiating germ cells in both males

110 and females, suggesting that it plays a role in post-transcriptional gene regulation in both  
111 spermatogenesis and oogenesis. In this study we demonstrate that Tdrd5l localizes to a novel  
112 germline RNA granule that associates with, but is distinct from, the nuage. Further, we  
113 demonstrate that, in females, *Tdrd5l* is important for post-transcriptional regulation of  
114 maternal RNAs. In *Tdrd5l* mutants, embryos exhibit defects in dorsal-ventral patterning and Grk  
115 and Orb (Oo-18 RNA-Binding Protein) prematurely accumulate in nurse cells instead of being  
116 primarily expressed in the oocyte. Thus, one important role for *Tdrd5l* is in regulation of  
117 maternal RNAs as they are being transported from the nurse cells to the oocyte.

118

## 119 **Results**

### 120 **Tdrd5l localizes to cytoplasmic granules in the *Drosophila* germline**

121 To visualize the endogenous Tdrd5l protein, we used CRISPR/Cas9 to generate epitope-  
122 tagged alleles of the endogenous *Tdrd5l* locus. Interestingly, both N- and C-terminally tagged  
123 alleles behaved as loss of function alleles. Since we previously characterized Tdrd5l expression  
124 using an N-terminally tagged BAC construct, it was particularly important to evaluate Tdrd5l  
125 expression under normal conditions. Therefore, we generated internal hemagglutinin (HA) and  
126 FLAG epitope-tagged alleles (Fig S1A), and these behaved as wt alleles of *Tdrd5l*. We also  
127 generated a peptide guinea pig polyclonal antibody using amino acids 65-81 of Tdrd5l. This  
128 antiserum yielded a similar staining pattern to the internally tagged *Tdrd5l* alleles and  
129 immunostaining was eliminated in *Tdrd5l* mutants (Figure S2).

130 Using the internally FLAG-tagged allele, we observed anti-FLAG immunoreactivity in a  
131 mixed population of small and larger cytoplasmic punctae or “granules” in the pre-meiotic male

132 germline (Fig 1A), in agreement with our previous work using the exogenous HA-tagged BAC  
133 construct (25). Interestingly, in the larger granules Tdrd5l immunostaining was only observed at  
134 the periphery of the granule (Fig 1B white arrow, Fig 1E). In addition, while there were both  
135 small and large granules present in the early germline, there was a progression from a mixed  
136 population in the GSCs (Fig 1A, white arrow) to only large granules in later cysts (Fig 1A, yellow  
137 arrow).

138 In the female germline, Tdrd5l immunostaining was greatly reduced compared to the  
139 male germline when using identical confocal settings (Fig S3A-B), but still localized to  
140 cytoplasmic granules (Fig 1C). Unlike in the male GSCs (Fig 1B brackets), Tdrd5l granules were  
141 absent from the germline stem cells (GSCs) in females (Fig 1D, brackets). Since Sxl represses  
142 Tdrd5l expression (25), this likely accounts for the lack of Tdrd5l expressing in female GSCs  
143 where Sxl is at highest levels (28). At later stages in the female germline, we observed Tdrd5l  
144 localizing to granules in the early differentiating germline of the germarium (Fig 1C), as well as  
145 in the nurse cells (Fig 1E and 1F, white arrow) and oocyte (Fig 1E, yellow arrow) until mid-  
146 oogenesis.

147

#### 148 **Tdrd5l localizes to a novel RNA granule**

149 We next analyzed the “Tdrd5l granule” to determine whether it corresponds to any  
150 previously identified RNA granules. To test whether these granules were dependent on RNA,  
151 we treated adult testes with RNase A (29). Testes treated with RNase A had a severe reduction  
152 in Tdrd5l staining which suggests that Tdrd5l granules depend on RNA for their stability (Fig S4C  
153 and D).

154           One prominent germline RNA granule is the perinuclear nuage, which acts as the site of  
155 piRNA production for transposon repression (30–32) and contains other tudor-domain  
156 containing proteins (8,9,33). One hallmark of the nuage is the presence of Vasa protein (34).  
157 We observed that the Tdrd5l-containing granules often associate with or are imbedded in  
158 regions of Vasa immunoreactivity, but that Vasa staining is not detected within the Tdrd5l  
159 granules themselves (Fig 2A, arrows). Analysis of the distribution of Tdrd5l granules revealed  
160 that there was an even distribution between granules that exhibit cytoplasmic and perinuclear  
161 localization, and granules in both locations were associated with Vasa immunoreactivity (Fig  
162 S4A-B). These data indicate that there may be a relationship between the Tdrd5l granules and  
163 the nuage, but that the Tdrd5l granules themselves are not part of the nuage as defined by  
164 Vasa staining.

165           Two additional RNA granules that are commonly found in many cell types are the P  
166 bodies, sites of post-transcriptional RNA regulation, and U bodies, which are involved in snRNP  
167 maturation (35). A common P body component is Decapping protein 1 (Dcp1) (36) and we  
168 visualized Dcp1 immunofluorescence in combination with Tdrd5l (Fig 2B). We did not observe  
169 co-localization between Dcp1-containing punctae and Tdrd5l, and the Dcp1-containing bodies  
170 were also of much smaller size than Tdrd5l granules. In 63% of Tdrd5l granules, we did observe  
171 Dcp1 labeled P-bodies bodies associated with the periphery of Tdrd5l granules (e.g. Fig 2B  
172 arrow). This suggests that there may be a relationship between P bodies and Tdrd5l bodies or  
173 exchange of materials between these structures, but these data indicate that the two types of  
174 bodies are distinct. We visualized U bodies using an endogenously tagged allele of Survival  
175 Motor Neuron (SMN) (35) and we failed to observe co-localization between SMN-containing



176 bodies and Tdrd5l (Fig 2C). Taken together, these data indicate that the Tdrd5l granules are  
177 distinct structures from the nuage, P bodies and U bodies.

178

### 179 **Tdrd5l genetically interacts with post-transcriptional regulatory factors.**

180 Since cytoplasmic RNA granules are often important for post-transcriptional gene  
181 regulation, we determined whether *Tdrd5l* exhibited genetic interaction with known post-  
182 transcriptional regulation pathways. To ask whether Tdrd5l functions in regulating translation  
183 and RNA stability by influencing poly(A) tail length, we tested for a genetic interaction between  
184 *Tdrd5l* and *twin*, which encodes the CCR4 homolog and major deadenylase in *Drosophila* (37).  
185 Expression of a weak RNAi trigger for *twin* in the germline of wild-type (wt) females (*nos-Gal4*,  
186 UAS-*twin* RNAi) caused no morphological or fertility defects (Fig 3A). *Tdrd5l* heterozygous  
187 animals also exhibit no morphological or fertility defects on their own. However, when the *twin*  
188 RNAi trigger was expressed in the germline of females heterozygous for a mutation in *Tdrd5l*  
189 (*nos-Gal4*, UAS-*twin* RNAi, *Tdrd5l*/+), we observed severely disorganized ovaries that lacked  
190 recognizable egg chambers (Fig 3B) and these animals were completely sterile. Additionally, to  
191 test whether Tdrd5l functions in regulating mRNA stability through removal of the mRNA 5' cap,  
192 we tested for a genetic interaction with *Dcp1*, which encodes one of the major mRNA  
193 decapping enzymes in *Drosophila* (13). As in the case of the *twin* knockdown, there were no  
194 morphological or fertility defects when our *Dcp1* RNAi line was expressed in the germline of wt  
195 females (*nos-Gal4*, UAS-*Dcp1* RNAi, Fig 3C). However, when *Dcp1* was knocked down in the  
196 germline of females heterozygous for a mutation in *Tdrd5l*, the ovaries exhibited a severe  
197 morphological defect and lack of germline (Fig 3D), and these animals were also completely

198 sterile. These dramatic, dose-sensitive genetic interactions between *Tdrd5l* and *twin* or *Dcp1*  
199 indicate that *Tdrd5l* normally functions in post-transcriptional repression of mRNAs through  
200 both the deadenylation and decapping pathways.

201

## 202 ***Tdrd5l* is important for proper egg development**

203 One place where post-transcriptional gene regulation is particularly important is in the  
204 developing egg chambers of the female germline. Females trans-heterozygous for predicted  
205 null mutant alleles of *Tdrd5l* exhibit a relatively normal ovary morphology but lay slightly  
206 reduced numbers of eggs (Fig S5A). To determine whether the levels of any mRNAs are  
207 regulated by *Tdrd5l* we conducted RNAseq in wildtype vs *Tdrd5l*-mutant ovaries. Interestingly,  
208 the mRNAs altered in *Tdrd5l* mutants were enriched for genes that are maternally deposited in  
209 the embryo, as defined by genes present in 0-2 hr old embryos (38). While maternal genes  
210 represent 23.3% of all *Drosophila* genes, they represent 30% of genes altered in *Tdrd5l* mutants  
211 (Fig S6A-B). Further, when the analysis is restricted to genes with a 2-fold or greater change in  
212 mRNA level in *Tdrd5l* mutants, the percentage of maternally-expressed genes rises to 94% (Fig  
213 S6C). Additionally, we compared our RNAseq data to previously published data identifying RNAs  
214 associated with the BicaucaID (BicD)/Egalitarian (Egl) complex involved in transport of RNAs  
215 from nurse cells to the oocyte (39). While mRNAs identified in our RNA-seq analysis represent  
216 10.4% of all genes in the *Drosophila* genome, they represent 30% of the top 100 mRNAs  
217 associated with the BicD/Egl complex, further suggesting a role for *Tdrd5l* in regulating mRNAs  
218 that are deposited maternally in the oocyte during oogenesis (Fig S6D).

219           In *Drosophila*, maternally deposited RNAs are transcribed in the nurse cells where they  
220 are silenced until they get to their proper location in the oocyte and are then translationally  
221 activated at specific times (40). To investigate whether *Tdrd5l* plays a role in this process we  
222 tested whether the eggs laid by *Tdrd5l*-mutant females exhibited defects in development when  
223 crossed to wildtype males. Indeed, we observed that these eggs were greatly reduced in their  
224 ability to hatch and give rise to viable larvae (Fig 4A). To determine if the decrease in hatch rate  
225 was due to patterning defects, we examined the dorsal appendages (DA) on the offspring, an  
226 indicator of Dorsal/Ventral patterning (41). Offspring from trans-heterozygous *Tdrd5l*-mutant  
227 females exhibited a greatly increased frequency of DA defects (Fig 4B), which ranged from  
228 alterations of DA length (Fig 4D) to a fusion of DA material into a ring (Fig 4E) or a single fused  
229 appendage (Fig 4F). If the defects in dorsal-ventral patterning are the major reason behind the  
230 embryonic defects, then we would expect that the majority of unhatched embryos would  
231 exhibit DA defects. However, when we examined the DA defects specifically of those embryos  
232 that failed to hatch, we did not observe a greater percentage of DA defects as we observed  
233 when examining all embryos. This indicates that, while DA defects and possibly D/V defects are  
234 the probable cause of death for many of the embryos, other embryos are likely to die for other  
235 reasons. When we attempted to examine the cuticle pattern of unhatched embryos we  
236 observed no discernable cuticle pattern, indicating that these embryos die prior to cuticle  
237 deposition.

238

239 ***Tdrd5l* is required for repression of Grk expression in nurse cells**

240           The D/V and anterior/posterior (A/P) axes in the developing oocytes are set up by  
241 localized translation of maternally deposited RNAs. These RNAs are transcribed in the nurse  
242 cells and post-transcriptionally silenced during transport to the oocyte (40). Three of the classic  
243 maternally deposited RNAs are *gurken* (*grk*), which regulates D/V patterning and DA formation  
244 (20,21), *bicoid* (*bcd*) which determines anterior fate (24), and *oskar* (*osk*) which specifies  
245 posterior identity and the germ plasm (22). To determine if *Tdrd5l* regulates maternally  
246 deposited RNAs we immunostained for the protein products of these three mRNAs in wildtype  
247 and *Tdrd5l*-mutant ovaries. Both Grk and Osk protein staining were altered in *Tdrd5l*-mutant  
248 ovaries (Fig 5A-H), whereas no Bcd staining was observed in the mutant ovaries, similar to wt  
249 (data not shown). In wt ovaries, Grk immunoreactivity is normally observed in the dorsal-  
250 anterior corner of the oocyte (Fig 5A, arrowhead) and is absent from the nurse cells of  
251 developing egg chambers (Fig 5C). However, in *Tdrd5l* mutant ovaries we observed Grk staining  
252 in the nurse cells of mid-stage egg chambers of 80% of ovaries tested (Fig 5D, outlined and  
253 inset), suggesting the *grk* mRNA is no longer translationally repressed in the nurse cells. In  
254 addition, we still observed Grk immunoreactivity at the dorsal-anterior corner of developing  
255 oocytes (Fig 5B) in *Tdrd5l* mutants.

256           In wt ovaries, Osk immunostaining is normally restricted to the posterior pole of  
257 developing oocytes beginning at stage 10 (Fig 5E, arrowhead) (22). In stage 10 *Tdrd5l*-mutant  
258 egg chambers we still observed Osk protein correctly localized to the posterior pole (Fig 5F).  
259 However, in 77% of stage 9 *Tdrd5l*-mutant egg chambers we observed premature staining for  
260 Osk, and in these cases Osk protein was localized to the middle of the oocyte, rather than the

261 posterior end (Fig 5H). However unlike with Grk, we did not observe Osk protein expressed in  
262 the nurse cells of *Tdrd5l* mutants (Fig 5H).

263 To determine if the ectopic expression of Grk and Osk proteins was due to defects in  
264 RNA transport from the nurse cells or RNA localization in the oocyte, we conducted fluorescent  
265 *in situ* hybridization (FISH) to visualize the *grk* and *osk* mRNAs (Fig 5I-L). We observed no  
266 changes in *grk* mRNA localization between wildtype and *Tdrd5*-mutant ovaries (Fig 5I-J).  
267 Contrary to what we observed with the *grk* RNA, we observed altered *osk* mRNA localization in  
268 *Tdrd5l*-mutant oocytes (Fig 5L). In *Tdrd5l* mutant oocytes, *osk* mRNA was not tightly localized to  
269 the posterior and was instead observed throughout the oocyte in a 31% of ovaries (Fig 5L).

270 Grk is first required at the posterior of the oocyte to specify the posterior follicle cells,  
271 which are then required for proper microtubule orientation and localization of *osk* RNA and  
272 protein to the posterior pole (42). Thus, it is possible that the mis-localization of *osk* we  
273 observed could be secondary to defects in *grk* function. To test whether the microtubule  
274 network is properly oriented in *Tdrd5l* mutants, we used Kinesin-LacZ (Kin-LacZ) to mark the  
275 plus ends of the microtubules (21). In wt ovaries the microtubule network in the oocyte is  
276 polarized with plus ends at the posterior, therefore Kin-LacZ should be localized tightly to the  
277 posterior by stages 9 and 10 of egg chamber development (Fig S7a white arrow, and Fig S7B  
278 yellow arrow). In *Tdrd5l*-mutant ovaries we detected a range of Kin-LacZ localization. Some  
279 oocytes had tight posterior localization, while others had some posterior localization of Kin-LacZ  
280 with plumes of staining extending away from the posterior pole. In the most extreme cases we  
281 observed diffuse Kin-LacZ localization in the center of the oocyte (Fig S7C white arrow and Fig

282 S7D yellow arrow). These data indicate that the defects in *osk* posterior localization may be  
283 caused by loss of *grk* function rather than defects in the direct regulation of *osk* itself.

284

### 285 ***Tdrd5l* represses Orb protein expression in nurse cells**

286 Work by other labs has shown that Grk translation in the oocyte is activated by Oo18  
287 RNA binding protein (Orb) (43–45). Orb is a cytoplasmic polyadenylation element binding  
288 protein (CPEB) that is highly expressed in the oocyte where it recruits Wispy to lengthen the *grk*  
289 poly(A) tail to activate its translation (44). It has also been shown that ectopic expression of Orb  
290 in the nurse cells is sufficient to activate Grk translation in the nurse cells (45). To test whether  
291 ectopic expression of Orb in the nurse cells could also be the cause of Grk translation in *Tdrd5l*-  
292 mutant nurse cells, we stained for Orb protein in *Tdrd5l*-mutant ovaries. As previously  
293 described, in wt ovaries we observed Orb immunofluorescence primarily in the oocyte and it  
294 was largely absent from the nurse cells of later egg chambers, except the nurse cell closest to  
295 the oocyte (Fig 6A, squared region). In *Tdrd5l*-mutant ovaries we saw an expansion of Orb  
296 protein expression into almost all the nurse cells suggesting Orb translation had been de-  
297 repressed in *Tdrd5l* mutants (Fig 6B, squared region).

298 To test whether the phenotype observed in *Tdrd5l* mutants is due to increased Orb  
299 expression, we determined whether reduction of *orb* function could suppress the *Tdrd5l*-  
300 mutant phenotype by examining egg laying and hatch rates. *Tdrd5l* mutants that were also  
301 heterozygous for an *orb* loss of function allele (*Tdrd5l*-/*Tdrd5l*-; *orb*<sup>mel</sup>/+ females) laid more eggs  
302 compared to their *Tdrd5l*-/*Tdrd5l*- siblings (Fig 6C), and also exhibited and increase in egg hatch

303 rate (Fig 6D). This suggests that the defects observed in *Tdrd5l* mutants are partially due to the  
304 increased Orb expression observed in the nurse cells.

305

## 306 **Discussion**

307 Work from a number of labs has demonstrated the importance of RNA granules for  
308 proper germ cell identity and function (15,22,46,47). Here we have extended our study of  
309 *Tdrd5l* and show that it localizes to the periphery of what is likely a cytoplasmic RNA granule.  
310 The “*Tdrd5l*” granule does not exhibit the characteristics of previously identified RNA granules  
311 in the *Drosophila* germline, meaning that it is likely a novel structure. While we previously  
312 demonstrated that *Tdrd5l* expression is highly male-biased in the undifferentiated germline, we  
313 show here that *Tdrd5l* granules are also present during germline differentiation in females.  
314 Rather than regulating piRNA production and transposon expression like other *Tdrd5* proteins,  
315 *Tdrd5l* regulates the expression of maternal RNAs that need to be silenced in nurse cells as they  
316 are transported to the oocyte.

317

## 318 **The “*Tdrd5l* granule” represents a new type of germline RNA granule in *Drosophila***

319 We used both an epitope-tag placed into the endogenous *Tdrd5l* locus, as well as a  
320 peptide polyclonal antibody generated against *Tdrd5l*, to verify and characterize further the  
321 localization of *Tdrd5l*. We were able to verify that *Tdrd5l* is more highly expressed in the male  
322 germline than the female germline, particularly in the germline stem cells where *Tdrd5l* is  
323 specific to male GSCs. This is consistent with *Sex lethal* being a repressor of *Tdrd5l* expression as  
324 we previously found (25). However, we also describe the expression of *Tdrd5l* in the female

325 germline, where it is found in punctae in the germarium, in germ cells that have begun to  
326 differentiate (Fig 1C-D), and in nurse cells and oocytes in the developing egg chambers (Fig 1E-  
327 F). Interestingly, the punctae of Tdrd5l expression appear “hollow” (Fig 2) indicating that Tdrd5l  
328 resides on the surface of the structures it identifies. The fact that Tdrd5l immunostaining is  
329 sensitive to RNase treatment (Fig 4C-D) further suggests that these are ribonuclear protein  
330 granules that form independent domains within the germ cell cytoplasm.

331         Our analysis also indicates that the Tdrd5l granules are not representative of any type of  
332 granule previously described in the *Drosophila* germline. The most prominent germline RNA  
333 granule is the perinuclear nuage which contains the helicase Vasa. While the Tdrd5l granules  
334 are often observed in a perinuclear location (Fig 2A), these granules notably lack Vasa (Fig 2A  
335 and S4A-B). Thus, while Tdrd5l granules may interact with the nuage, they appear to be distinct  
336 entities. A large granule, the piRNA nuage giant body, has been described that is associated  
337 with the nuage (48). However, unlike the Tdrd5l body, this body also contains Vasa and appears  
338 only in primary spermatocytes, and so is distinct from the Tdrd5l granule. The localization of the  
339 Tdrd5l granule is also inconsistent with it being part of the germ plasm or sponge bodies found  
340 in the oocyte (46,49–51). The Tdrd5l granule also appears to be distinct from other RNA  
341 granules found more commonly in different cell types, such as P bodies, U bodies and stress  
342 granules. P bodies characteristically contain Dcp1 and are much smaller in size than Tdrd5l  
343 granules. Our previous work suggested some overlap in localization between Tdrd5l and Dcp1  
344 (25) but the more detailed analysis described here reveals that smaller, Dcp1-positive bodies  
345 can be seen associating with Tdrd5l granules, but that Dcp1 is not present in the Tdrd5l  
346 granules themselves (Fig 2B). We also do not see overlap between Tdrd5l and the U body



347 protein Smn (Fig 2C). Lastly, the Tdrd5l granules are observed constitutively in the germline and  
348 are not affected by stresses such as starvation or changes in temperature (C.P. unpublished  
349 data) indicating that they are not stress granules.

350 Germline granules have been most well-studied in *C. elegans*, and a number of distinct  
351 regions of the nuage have been described in this species (52,53). At many stages of germline  
352 development, P granules are associated with the nuclear periphery and, like *Drosophila* nuage,  
353 contain Vasa-class helicases (the GLH's) as well as Ago proteins (54–56). However, associated  
354 with the P granules are other perinuclear regions known as the Mutator foci, SIMR foci and the  
355 Z granules, that have distinct protein components (53). One possibility is that the Tdrd5l  
356 granule represents a similar sub-structure associated with the nuage in *Drosophila*. In addition  
357 to studying the function of *Tdrd5l*, identifying other proteins and possibly RNAs that are present  
358 in the Tdrd5l granule will be an important next step.

359

### 360 **Function of the Tdrd5 proteins**

361 There are many types of Tudor domain containing proteins and they can be classified  
362 into sub-families based on the homology of their Tudor domains. In diverse animal species,  
363 including mouse and humans, there is a single Tdrd5 protein. Interestingly, flies have two such  
364 proteins, Tdrd5l and Tejas (10,25). Many Tdrd5 proteins, like mouse Tdrd5 and *Drosophila*  
365 Tejas, also contain an N-terminal LOTUS domain which is known to bind Vasa-type helicases  
366 (27), but *Drosophila* Tdrd5l lacks this domain. However, the N-terminus of Tdrd5l must be  
367 important for its function since placing even a small epitope tag in this position compromises  
368 *Tdrd5l* function. Consistent with its Vasa-binding LOTUS domain, Tejas associates with the

369 nuage where it acts in the piRNA pathway to repress germline transposon expression (10). In  
370 contrast, we did not observe Tdrd5l co-localizing with the Vasa-positive nuage (Fig 2A), and we  
371 have observed no change in transposon expression in *Tdrd5l* mutants (25). Instead, we find that  
372 *Tdrd5l* exhibits potent genetic interaction with pathways that repress mRNAs at the post-  
373 transcriptional level, including the mRNA decapping and deadenylation pathways (Fig 3). This is  
374 also consistent with a role for Tdrd5l in regulating mRNA repression in nurse cells (see below).  
375 Thus, it may be that Tejas is more specific for transposon regulation while Tdrd5l is involved in  
376 post-transcriptional regulation of germline mRNAs.

377         Mouse Tdrd5 associates with the Chromatoid Body, a nuage-related structure. In  
378 addition, mice mutant for Tdrd5 exhibit defects in transposon regulation and spermatogenesis  
379 (26), similar to *Drosophila tejas* (10). Interestingly, Tdrd5 mutant mice also exhibit defects in  
380 regulation of pachytene piRNAs (57,58), which are proposed to regulate mRNAs important for  
381 spermatogenesis rather than to repress transposons. One intriguing hypothesis is that the role  
382 of the single Tdrd5 protein in mice in regulating both transposon repression and mRNA  
383 expression has been divided between the two Tdrd5 proteins in *Drosophila*, Tejas and Tdrd5l. In  
384 addition, both *Drosophila* proteins have functions in oogenesis in addition to spermatogenesis  
385 (10,25, this work). Similarly, knock down of a Tdrd5 homolog in Locust also affects both  
386 oogenesis and spermatogenesis (59). While a role for mouse Tdrd5 in the female germline has  
387 not been described, consortium data indicate that Tdrd5 is expressed in the mouse ovary (60),  
388 making this an interesting place to look for additional functions for Tdrd5 in the mouse.

389

390 **Regulation of Maternally deposited RNAs**

391 Prior work from our lab demonstrated that *Tdrd5l* promotes male identity in the  
392 germline. Consistent with this, *Tdrd5l* is expressed in male GSCs but is repressed in female GSCs  
393 by the action of *Sxl* (25). However, *Tdrd5l* is also expressed in differentiating germ cells in both  
394 males and females ((25), and Fig 1C-F). This suggests that *Tdrd5l* might promote male identity in  
395 early germ cells and germline stem cells but also regulate aspects of germline differentiation in  
396 both sexes. One process in the female germline that relies heavily on post-transcriptional  
397 regulation of RNAs is the production and transport of maternal RNAs from nurse cells into the  
398 oocyte.

399 Maternal contribution of RNAs, proteins, and organelles is conserved from flies through  
400 vertebrates (61,62), and supports embryonic patterning and embryogenesis prior to activation  
401 of the zygotic genome and beyond. In *Drosophila*, maternal RNAs are transcribed in the nurse  
402 cells, and are post-transcriptionally silenced to prevent their translation during transport to the  
403 oocyte and prior to the specific time they should be activated. The cytoplasmic polyadenylation  
404 element binding protein (CPEB) *Orb* is known to activate translation of maternal RNAs such as  
405 *osk* and *grk* in the oocyte (44,45,63). Like other maternal RNAs, *orb* is transcribed in nurse cells  
406 and transported to the oocyte where it is translated. Interestingly, *Orb*/CPEB homologs are  
407 critical for regulating translation of maternal RNAs in vertebrate systems as well (64).

408 We observed defects in expression of *Orb*, *Grk* and *Osk* proteins in *Tdrd5l* mutants (Fig 5  
409 and Fig 6). We saw ectopic accumulation of both *Orb* and *Grk* in nurse cells (Fig 5D and Fig 6B),  
410 while *Osk* protein was sometimes observed in the middle of the oocyte instead of its normal  
411 location at the posterior pole (Fig 5H). We also observed maternal-effect lethality of embryos  
412 from *Tdrd5l*-mutant mothers that included dorsal appendage defects consistent with *Grk*'s role

413 in dorsal-ventral patterning. One possible explanation for all of these phenotypes is a failure of  
414 Orb to be properly repressed in nurse cells. Ectopic Orb translation in nurse cells can cause  
415 improper activation of Grk translation in these cells (45), and this might also lead to insufficient  
416 translation of Grk in the oocyte. Early Grk expression at the posterior pole of the oocyte is  
417 necessary for proper posterior determination and defects in this process can lead to disruption  
418 of *osk* mRNA and protein localization to the posterior pole (19,21) as observed in *Tdrd5l*  
419 mutants (Fig 5L). Further, impaired Grk expression in the dorsal-anterior corner of the oocyte  
420 can cause improper specification of dorsal follicle cells, and defects in dorsal appendage  
421 formation and dorsal-ventral patterning of the embryo. Thus, the primary defect in *Tdrd5l*  
422 mutants could be a failure to properly repress *orb* translation in the nurse cells.

423 Other factors have been implicated in repressing *orb* translation in nurse cells, including  
424 FMR1, the Drosophila homolog of Fragile X mental retardation protein (65), and Cup, a  
425 translational repressor (66). Mutations in both *FMR1* and *cup* cause Orb accumulation in nurse  
426 cells similar to what we observe in *Tdrd5l* mutants. One intriguing hypothesis is that the Tdrd5l  
427 granule in nurse cells is a site where mRNAs such as *orb* get marked for translational repression  
428 by factors such as FMR and Cup. Since the nuage and nuage-related material in flies, worms and  
429 mice all function in small RNA regulatory pathways, the marking of mRNAs like *orb* in the Tdrd5l  
430 granule may also involve such regulatory RNAs.

431

## 432 **Materials and Methods**

### 433 **Fly stocks and CRISPR tagging**

434 Fly stocks used in this paper were obtained from the Bloomington stock center unless  
435 otherwise noted. *Nos-gal4* (67), *twin* RNAi(BDSC# 32901), *Dcp1* RNAi(BDSC# 67874), *mcherry*  
436 RNAi(BDSC# 35785), *orb* RNAi(BDSC# 43143), *Vasa-Cas9*(BDSC# 56552), and piggyBac (BDSC#  
437 32070), Kin-LacZ (T. Schupbach) . *Tdrd5l* mutant alleles were generated previously by our lab  
438 (25). *Tdrd5l*:GFP and *Tdrd5l*:FLAG alleles were generated using CRISPR as described by the fly  
439 CRISPR group (68). The GFP and FLAG donor plasmids and pU6 gRNA plasmid were obtained  
440 from the *drosophila* genetics resources center and were stock numbers 1365, 1367, 1363  
441 respectively.

442

#### 443 **Immunofluorescence and antibody generation**

444 All gonads were dissected, and fixed, and stained as previously published (69). All images were  
445 taken on a Zeiss LSM 700 or LSM 800 with airyscan detector (when noted). Primary antibodies  
446 used were Guinea pig anti-Tdrd5l 1:10,000 (this paper), rat anti-HA 1:100 (Roche 3F10), rabbit  
447 anti- Vasa 1:10,000 (R, Lehman), Guinea pig anti-TJ 1:1000 (J. Jemc), mouse anti Armadillo  
448 1:100 (DSHB), Mouse anti Orb 1:40 (DSHB), mouse anti- Gurken 1:20 (DSHB), rabbit anti-oskar  
449 1:1000 (A. Ephrussi). Secondary antibodies were used at 1:500 (Alexa Flour). Samples were  
450 stained in DAPI solution and mounted in DABCO.

451

#### 452 **Quantification of nuage association**

453 To quantify the association of Tdrd5l granules with Vasa, we calculated the number of Tdrd5l  
454 granules in the 8 and 16 cell cysts that localized either to the nuclear periphery (perinuclear) or

455 to the cytoplasm. For each group we then calculated the number of *Tdrd5l* granules that are  
456 directly adjacent to vasa granules, co-localize, or do not associate with vasa at all

#### 457 **Egg lay assays**

458 Trans-heterozygous *Tdrd5l* mutant females and control females were aged 7days with *OregonR*  
459 males. Individual females and males were placed in condos on grape juice plates with wet yeast  
460 paste for 24hrs, and then taken off the plate. The number of eggs laid and those with dorsal  
461 appendage defects were counted for each female. At 48hrs these counts were done again to  
462 count how many had hatched.

#### 463 **Genetic interaction assays**

464 UAS-RNAi lines were crossed to Nos-gal4 for controls or *Tdrd5l<sup>Q5</sup>::nos-gal4* for mutants. To  
465 conduct this screen each gene was knocked down using a UASp-shRNAi driven in the germline  
466 by nanos-gal4 in a wildtype background and in a *Tdrd5l*- background. *Tdrd5l* males analyzed  
467 were hemizygous for a null allele of *Tdrd5l* (*Tdrd5l/Y*) while females were heterozygous (*Tdrd5l/*  
468 +) Progeny were aged 5-10days then dissected immunostained as described above using anti-  
469 vasa, anti-TJ, anti-Arm and DAPI.

#### 470 **Fluorescence in situ hybridization**

471 FISH for *gurken* and *oskar* were conducted as published by the Berg lab (70). cDNA clones 2169  
472 and 7305 for probes were obtained from the Drosophila genetics resource center.

#### 473 **RNA sequencing**

474 For testis RNA sequencing, Testes were dissected from 5d old males, RNA was prepped using  
475 RNA-Bee(Tel-test) 3 biological replicated were used for each genotype. Libraries were prepped

476 using a protocol (71). 100bp paired end sequencing was conducted by the Johns Hopkins  
477 Genetics Resources Core facility  
478 For ovary RNA sequencing, ovaries were dissected from virgin females, and 3 biological  
479 replicates were dissected per genotype. RNA was prepped using The Direct-zol RNA micro prep  
480 kit (zymogen). Library construction and 100bp paired end sequencing was conducted by the  
481 Johns Hopkins Genetics Resources Core facility.

#### 482 **RNAseq Analysis**

483 Read quality for both the ovary and testis RNAseq data was determined using the fastQC kit.  
484 Reads were mapped using Tophat and HTSeq to the *Drosophila* genome using Ensemble release  
485 BDGP6. Differential gene expression analysis was conducted using DESeq.

486

#### 487 **Acknowledgements**

488

489 We thank the *Drosophila* community, the Bloomington stock center, DRGC, and Developmental  
490 Studies Hybridoma Bank for stocks and reagents. We would also like to thank the Chou lab for  
491 Dcp1-YFP flies, as well as Trudi Schupbach and Liz Gavis for reagents and helpful discussion on  
492 this work. We thank members of the Johns Hopkins community; the Johnston lab, and John Kim  
493 for helpful discussion as well as Fred Tan and Leif Benner for help with bioinformatics.

494

495

496

#### 497 **Figure legend**

498 **Figure 1: Tdrd5l localized to cytoplasmic granules in the *drosophila* germline**

499 (A-E) immunofluorescence of Tdrd5l in the germline using FLAG tagged Tdrd5l. A) Tdrd5l  
500 localizes to granules in the male germline. Small granules are marked by a white arrow head,  
501 and a large granule is marked by a yellow arrowhead. B) Tdrd5l is expressed in male germline  
502 stem cells (GSCs) marked by brackets. Granule with Tdrd5l localized to the periphery is marked  
503 by the white arrow C) Tdrd5l localizes to granules in the germaria of female ovaries as outlined  
504 by the dashed line. D) Tdrd5l is not expressed in female GSCs as marked by brackets. E) Tdrd5l  
505 is expressed in nurse cells in the female germline. Oocyte staining is marked by a yellow  
506 arrowhead and a nurse cell granule is marked by a white arrowhead.

507

### 508 **Figure 2: Tdrd5l localizes to a novel RNA granule**

509 A) Immunostaining of gonads for Vasa positive nuage and Tdrd5l granules showed that Tdrd5l  
510 granules are closely adjacent to the Nuage but did not colocalize as marked by white arrows.  
511 B) Tdrd5l granules and processing bodies marked by Dcp1:YFP as marked by yellow arrows. C)  
512 Tdrd5l granules marked by the yellow granule do not colocalize with U-bodies marked by a  
513 white arrowhead

514

### 515 **Figure 3: Tdrd5l genetically interacts with post-transcriptional gene regulatory factors**

516 (A-F) immunofluorescence of gonads from *Tdrd5l* genetic interaction assays with *twin* and *dcp1*.  
517 A) *twin* RNAi in the germline of wildtype males produced normal gonads. B) *twin* RNAi in the  
518 germline of *Tdrd5l* mutant males resulted in sterile gonads. C) *twin* RNAi in the germline of  
519 wildtype females produced normal gonads. D) *twin* RNAi in the germline of *Tdrd5l*- females  
520 results in tumorous and sterile ovaries. E) *dcp1* RNAi in the germline of wildtype females  
521 produced normal gonads. F) *dcp1* RNAi in the germline of *Tdrd5l*- females resulted in germline  
522 loss.

523

### 524 **Figure 4: Tdrd5l is important for proper egg development**

525 A) quantification of hatch rate of eggs laid during single female fecundity assays. Eggs laid by  
526 *Tdrd5l* mutants are represented by orange dots and eggs laid by control flies are represented by  
527 blue dots. B) Quantification of dorsal appendage defects found in eggs laid during single female  
528 fecundity assays. (C-F) examples of dorsal appendages quantified in B. C) example of an egg  
529 with normal dorsal appendages. (D-F) examples of eggs with dorsal appendage defects.

530

### 531 **Figure 5: Tdrd5l regulates maternally deposited RNAs**

532 (A-H) immunofluorescence of proteins produced by maternally deposited RNAs using  
533 antibodies as indicated. A) Grk protein localizes to the dorsal anterior corner of wildtype  
534 oocytes as marked by the white arrowhead. B) diminished levels of Grk protein localize to the  
535 dorsal anterior corner of *Tdrd5l*- oocytes as marked by white arrows. C) Grk protein is absent  
536 from wildtype nurse cells. Outlined egg chamber is enlarged in bottom left inset. D) Grk protein  
537 was present in nurse cells of *Tdrd5l*- egg chambers. Outlined egg chamber is enlarged in bottom  
538 left inset. E) Osk protein was localized to the posterior of wild type oocytes as marked by  
539 yellow arrowhead. F) Osk protein is localized at increased levels to the posterior of *Tdrd5l*-  
540 oocytes as marked by the yellow arrow head. G) Osk protein was absent from mis stage  
541 wildtype nurse cells and oocytes. Oocyte is outlined with a yellow dashed line H) Osk protein



542 was localized to the center of mid stage *Tdrd5l*- oocytes. Oocyte is outlined by dashed yellow  
543 line.

544

#### 545 **Figure 6: Tdrd5l represses Orb translation**

546 (A-B) Orb immunofluorescence in ovaries. A) Orb protein expression was detected at high levels  
547 in wildtype oocytes. A') boxed area is enlarged in A'' B) Orb protein expression was detected in  
548 oocytes and nurse cells of *Tdrd5l*- ovaries. B') boxed area is enlarged in B'' (C-D) genetic  
549 interaction assay between *Tdrd5l* and *orb*. C) actin localized to the oocyte cortex in wildtype  
550 ovaries. D) cortical actin pulls away from C) fewer eggs are laid by *Tdrd5l*- females than by  
551 *Tdrd5l*- mutant females with an *orb<sup>mel</sup>* allele. D) decreased hatch rate in eggs laid by *Tdrd5l*-  
552 mutants is partially rescued by *orb<sup>mel</sup>*.

553

#### 554 **Supplemental figure 1: Tdrd5l localized to cytoplasmic granules in the *drosophila* germline**

555 A) Schematic of the *Tdrd5l* gene locus, Includes where tags were inserted and the antibody  
556 epitope. (B-D) immunostaining of gonads with Tdrd5l N-terminally tagged by GFP. Antibodies  
557 used as indicated. B) GFP staining localizes to granules in females with one untagged copy of  
558 Tdrd5l. C) No GFP staining was detected in ovaries with only tagged Tdrd5l. D) No GFP staining  
559 was detected in testes with tagged Tdrd5l.

560

#### 561 **Supplemental figure 2: Validation of Tdrd5l antibody**

562 (A-B) immunofluorescence of the anti-Tdrd5l antibody. A) Tdrd5l staining was detected in  
563 wildtype testes. B) Tdrd5l staining was not detected in *Tdrd5l*- testes.

564

#### 565 **Supplemental figure 3: Tdrd5l expression is higher in males than females**

566 A) Tdrd5l-Flag staining in testes compared to B) Tdrd5l staining in ovaries.

567

#### 568 **Supplemental figure 4: Tdrd5l granules are RNA dependent**

569 A) quantification of Tdrd5l granule association with Vasa stained nuage. (B-C) RNase assay. B)  
570 Tdrd5l granules are present in testes treated with PBS. C) Tdrd5l granules were diminished in  
571 testes treated with PBS and RNaseA

572

#### 573 **Supplemental figure 5: Tdrd5l regulates maternally deposited RNAs**

574 (A-C) quantification of changes in maternal RNA expression in *Tdrd5l*- ovaries. A) 30% of  
575 differentially expressed genes in *Tdrd5l* mutant ovaries are maternally deposited B) 23% of all  
576 genes in the genome are maternally deposited. C) 90% of genes with a greater than 2 fold  
577 change in gene expression in *Tdrd5l* mutant ovaries are maternally deposited. D) 25% of RNAs  
578 pulled down in a previously published BicD/Egl RIP data set are upregulated in *Tdrd5l*- ovaries.  
579 E) Comparison of male and female *Tdrd5l* mutant RNAseq data

580

#### 581 **Supplemental figure 6: Tdrd5l is important for proper egg development**

582 (A-B) quantification of single female fecundity assays. A) fewer eggs are laid by *Tdrd5l*- females.  
583 B) unhatched eggs from *Tdrd5l*- tend to have dorsal appendage defects

584

#### 585 **Supplemental figure 7: Kinesin mis localizes in *Tdrd5l* mutant oocytes**

586 (A) Kin-LacZ staining in wildtype stage 9 egg chambers and in (B) wild type stage 10 egg  
587 chambers. (C) Kin lacZ staining in *Tdrd5l* mutant stage 9 egg chambers and in (D) *Tdrd5l* mutant  
588 stage 10 egg chambers. (E) Quantification of A-D

589

590

591 **Supplemental table 1: Male RNAseq**

592

593 **Supplemental table 2: Female RNAseq**

594

## 595 **References**

- 596 1. Pek JW, Anand A, Kai T. Tudor domain proteins in development. *Development*. 2012 Jul  
597 1;139(13):2255–66.
- 598 2. Boswell RE, Mahowald AP. tudor, a gene required for assembly of the germ plasm in  
599 *Drosophila melanogaster*. *Cell*. 1985 Nov 1;43(1):97–104.
- 600 3. Chuma S, Hosokawa M, Kitamura K, Kasai S, Fujioka M, Hiyoshi M, et al. Tdrd1/Mtr-1, a  
601 tudor-related gene, is essential for male germ-cell differentiation and nuage/germinal  
602 granule formation in mice. *Proc Natl Acad Sci*. 2006 Oct 24;103(43):15894–9.
- 603 4. Brahms H, Meheus L, De Brabandere V, Fischer U, Lührmann R. Symmetrical dimethylation  
604 of arginine residues in spliceosomal Sm protein B/B' and the Sm-like protein LSm4, and  
605 their interaction with the SMN protein. *RNA*. 2001 Nov;7(11):1531–42.
- 606 5. Friesen WJ, Massenet S, Paushkin S, Wyce A, Dreyfuss G. SMN, the Product of the Spinal  
607 Muscular Atrophy Gene, Binds Preferentially to Dimethylarginine-Containing Protein  
608 Targets. *Mol Cell*. 2001 May 25;7(5):1111–7.
- 609 6. Handler D, Olivieri D, Novatchkova M, Gruber FS, Meixner K, Mechtler K, et al. A  
610 systematic analysis of *Drosophila* TUDOR domain-containing proteins identifies Vreteno  
611 and the Tdrd12 family as essential primary piRNA pathway factors. *EMBO J*. 2011 Oct  
612 5;30(19):3977–93.
- 613 7. Tauber D, Tauber G, Parker R. Mechanisms and Regulation of RNA Condensation in RNP  
614 Granule Formation. *Trends Biochem Sci*. 2020 Sep;45(9):764–78.
- 615 8. Bardsley A, McDonald K, Boswell RE. Distribution of tudor protein in the *Drosophila*  
616 embryo suggests separation of functions based on site of localization. *Dev Camb Engl*.  
617 1993 Sep;119(1):207–19.
- 618 9. Chuma S, Hiyoshi M, Yamamoto A, Hosokawa M, Takamune K, Nakatsuji N. Mouse Tudor  
619 Repeat-1 (MTR-1) is a novel component of chromatoid bodies/nuages in male germ cells  
620 and forms a complex with snRNPs. *Mech Dev*. 2003 Sep 1;120(9):979–90.

- 621 10. Patil VS, Kai T. Repression of Retroelements in Drosophila Germline via piRNA Pathway by  
622 the Tudor Domain Protein Tejas. *Curr Biol*. 2010 Apr 27;20(8):724–30.
- 623 11. Brennecke J, Aravin AA, Stark A, Dus M, Kellis M, Sachidanandam R, et al. Discrete Small  
624 RNA-Generating Loci as Master Regulators of Transposon Activity in Drosophila. *Cell*. 2007  
625 Mar 23;128(6):1089–103.
- 626 12. Balagopal V, Parker R. Polysomes, P bodies and stress granules: states and fates of  
627 eukaryotic mRNAs. *Curr Opin Cell Biol*. 2009 Jun 1;21(3):403–8.
- 628 13. Behm-Ansmant I, Rehwinkel J, Doerks T, Stark A, Bork P, Izaurralde E. mRNA degradation  
629 by miRNAs and GW182 requires both CCR4:NOT deadenylase and DCP1:DCP2 decapping  
630 complexes. *Genes Dev*. 2006 Jul 15;20(14):1885–98.
- 631 14. Liu J, Valencia-Sanchez MA, Hannon GJ, Parker R. MicroRNA-dependent localization of  
632 targeted mRNAs to mammalian P-bodies. *Nat Cell Biol*. 2005 Jul;7(7):719–23.
- 633 15. Dodson AE, Kennedy S. Phase Separation in Germ Cells and Development. *Dev Cell*. 2020  
634 Oct 12;55(1):4–17.
- 635 16. Nakamura A, Amikura R, Hanyu K, Kobayashi S. Me31B silences translation of oocyte-  
636 localizing RNAs through the formation of cytoplasmic RNP complex during Drosophila  
637 oogenesis. *Development*. 2001 Sep 1;128(17):3233–42.
- 638 17. Johnston DS, Nüsslein-Volhard C. The origin of pattern and polarity in the Drosophila  
639 embryo. *Cell*. 1992 Jan 24;68(2):201–19.
- 640 18. Becalska AN, Gavis ER. Lighting up mRNA localization in Drosophila oogenesis. *Dev Camb*  
641 *Engl*. 2009 Aug;136(15):2493–503.
- 642 19. González-Reyes A, Elliott H, St Johnston D. Polarization of both major body axes in  
643 Drosophila by gurken-torpedo signalling. *Nature*. 1995 Jun;375(6533):654–8.
- 644 20. Neuman-Silberberg FS, Sch T. The Drosophila Dorsoventral Patterning Gene gurken  
645 Produces a Dorsally Localized RNA and Encodes a TGF( -like Protein. 1993;10.
- 646 21. Roth S, Neuman-Silberberg FS, Barcelo G, Schüpbach T. cornichon and the EGF receptor  
647 signaling process are necessary for both anterior-posterior and dorsal-ventral pattern  
648 formation in Drosophila. *Cell*. 1995 Jun 16;81(6):967–78.
- 649 22. Ephrussi A, Dickinson LK, Lehmann R. oskar organizes the germ plasm and directs  
650 localization of the posterior determinant nanos. *Cell*. 1991 Jul 12;66(1):37–50.
- 651 23. Wang C, Lehmann R. Nanos is the localized posterior determinant in Drosophila. *Cell*. 1991  
652 Aug;66(4):637–47.

- 653 24. Driever W, Nüsslein-Volhard C. The bicoid protein determines position in the *Drosophila*  
654 embryo in a concentration-dependent manner. *Cell*. 1988 Jul 1;54(1):95–104.
- 655 25. Primus S, Pozmanter C, Baxter K, Doren MV. Tudor-domain containing protein 5-like  
656 promotes male sexual identity in the *Drosophila* germline and is repressed in females by  
657 Sex lethal. *PLOS Genet*. 2019 Jul 22;15(7):e1007617.
- 658 26. Yabuta Y, Ohta H, Abe T, Kurimoto K, Chuma S, Saitou M. TDRD5 is required for  
659 retrotransposon silencing, chromatoid body assembly, and spermiogenesis in mice. *J Cell*  
660 *Biol*. 2011 Mar 7;192(5):781–95.
- 661 27. Jeske M, Müller CW, Ephrussi A. The LOTUS domain is a conserved DEAD-box RNA helicase  
662 regulator essential for the recruitment of Vasa to the germ plasm and nuage. *Genes Dev*.  
663 2017 May 1;31(9):939–52.
- 664 28. Bopp D, Horabin JI, Lersch RA, Cline TW, Schedl P. Expression of the Sex-lethal gene is  
665 controlled at multiple levels during *Drosophila* oogenesis. :16.
- 666 29. Lin MD, Jiao X, Grima D, Newbury SF, Kiledjian M, Chou TB. *Drosophila* processing bodies  
667 in oogenesis. *Dev Biol*. 2008 Oct 15;322(2):276–88.
- 668 30. Lim AK, Kai T. Unique germ-line organelle, nuage, functions to repress selfish genetic  
669 elements in *Drosophila melanogaster*. *Proc Natl Acad Sci*. 2007 Apr 17;104(16):6714–9.
- 670 31. Pane A, Wehr K, Schübach T. zucchini and squash encode two putative nucleases  
671 required for rasiRNA production in the *Drosophila* germline. *Dev Cell*. 2007 Jun;12(6):851–  
672 62.
- 673 32. Soper SFC, van der Heijden GW, Hardiman TC, Goodheart M, Martin SL, de Boer P, et al.  
674 Mouse maelstrom, a component of nuage, is essential for spermatogenesis and  
675 transposon repression in meiosis. *Dev Cell*. 2008 Aug;15(2):285–97.
- 676 33. Pan J, Goodheart M, Chuma S, Nakatsuji N, Page DC, Wang PJ. RNF17, a component of the  
677 mammalian germ cell nuage, is essential for spermiogenesis. *Development*. 2005 Sep  
678 15;132(18):4029–39.
- 679 34. Liang L, Diehl-Jones W, Lasko P. Localization of vasa protein to the *Drosophila* pole plasm is  
680 independent of its RNA-binding and helicase activities. *Development*. 1994 May  
681 1;120(5):1201–11.
- 682 35. Liu JL, Gall JG. U bodies are cytoplasmic structures that contain uridine-rich small nuclear  
683 ribonucleoproteins and associate with P bodies. *Proc Natl Acad Sci*. 2007 Jul  
684 10;104(28):11655–9.
- 685 36. Parker R, Sheth U. P Bodies and the Control of mRNA Translation and Degradation. *Mol*  
686 *Cell*. 2007 Mar 9;25(5):635–46.

- 687 37. Morris JZ, Hong A, Lilly MA, Lehmann R. twin, a CCR4 homolog, regulates cyclin poly(A) tail  
688 length to permit *Drosophila* oogenesis. *Development*. 2005 Mar 15;132(6):1165–74.
- 689 38. Graveley BR, Brooks AN, Carlson JW, Duff MO, Landolin JM, Yang L, et al. The  
690 Developmental Transcriptome of *Drosophila melanogaster*. *Nature*. 2011 Mar  
691 24;471(7339):473–9.
- 692 39. Vazquez-Pianzola P, Schaller B, Colombo M, Beuchle D, Neuenschwander S, Marcil A, et al.  
693 The mRNA transportome of the BicD/Egl transport machinery. *RNA Biol*. 2017 Jan  
694 2;14(1):73–89.
- 695 40. Johnstone O, Lasko P. Translational regulation and RNA localization in *Drosophila* oocytes  
696 and embryos. *Annu Rev Genet*. 2001;35:365–406.
- 697 41. Berg CA. The *Drosophila* shell game: patterning genes and morphological change. *Trends*  
698 *Genet*. 2005 Jun 1;21(6):346–55.
- 699 42. Zimyanin V, Lowe N, St Johnston D. An Oskar-Dependent Positive Feedback Loop  
700 Maintains the Polarity of the *Drosophila* Oocyte. *Curr Biol*. 2007 Feb 20;17(4):353–9.
- 701 43. Chang JS, Tan L, Wolf MR, Schedl P. Functioning of the *Drosophila orb* gene in *gurken*  
702 mRNA localization and translation. *Development*. 2001 Aug 15;128(16):3169–77.
- 703 44. Norvell A, Wong J, Randolph K, Thompson L. Wispy and Orb cooperate in the cytoplasmic  
704 polyadenylation of localized *gurken* mRNA. *Dev Dyn*. 2015;244(10):1276–85.
- 705 45. Davidson A, Parton RM, Rabouille C, Weil TT, Davis I. Localized Translation of *gurken*/TGF-  
706  $\alpha$  mRNA during Axis Specification Is Controlled by Access to Orb/CPEB on Processing  
707 Bodies. *Cell Rep*. 2016 Mar 15;14(10):2451–62.
- 708 46. Hay B, Ackerman L, Barbel S, Jan LY, Jan YN. Identification of a component of *Drosophila*  
709 polar granules. :16.
- 710 47. Voronina E, Seydoux G, Sassone-Corsi P, Nagamori I. RNA Granules in Germ Cells. *Cold*  
711 *Spring Harb Perspect Biol*. 2011 Dec 1;3(12):a002774.
- 712 48. Kibanov MV, Egorova KS, Ryazansky SS, Sokolova OA, Kotov AA, Olenkina OM, et al. A  
713 novel organelle, the piNG-body, in the nuage of *Drosophila* male germ cells is associated  
714 with piRNA-mediated gene silencing. *Mol Biol Cell*. 2011 Jul 20;22(18):3410–9.
- 715 49. Wilsch-Bräuninger M, Schwarz H, Nüsslein-Volhard C. A Sponge-like Structure Involved in  
716 the Association and Transport of Maternal Products during *Drosophila* Oogenesis. *J Cell*  
717 *Biol*. 1997 Nov 3;139(3):817–29.
- 718 50. Mahowald AP. Fine structure of pole cells and polar granules in *Drosophila melanogaster*. *J*  
719 *Exp Zool*. 1962;151(3):201–15.

- 720 51. Lasko PF, Ashburner M. Posterior localization of vasa protein correlates with, but is not  
721 sufficient for, pole cell development. *Genes Dev.* 1990 Jun;4(6):905–21.
- 722 52. Ouyang JPT, Seydoux G. Nuage condensates: accelerators or circuit breakers for sRNA  
723 silencing pathways? *RNA N Y N.* 2022 Jan;28(1):58–66.
- 724 53. Sundby AE, Molnar RI, Claycomb JM. Connecting the Dots: Linking *Caenorhabditis elegans*  
725 Small RNA Pathways and Germ Granules. *Trends Cell Biol.* 2021 May;31(5):387–401.
- 726 54. Gruidl ME, Smith PA, Kuznicki KA, McCrone JS, Kirchner J, Roussel DL, et al. Multiple  
727 potential germ-line helicases are components of the germ-line-specific P granules of  
728 *Caenorhabditis elegans*. *Proc Natl Acad Sci U S A.* 1996 Nov 26;93(24):13837–42.
- 729 55. Batista PJ, Ruby JG, Claycomb JM, Chiang R, Fahlgren N, Kasschau KD, et al. PRG-1 and  
730 21U-RNAs interact to form the piRNA complex required for fertility in *C. elegans*. *Mol Cell.*  
731 2008 Jul 11;31(1):67–78.
- 732 56. Wang G, Reinke V. A *C. elegans* Piwi, PRG-1, regulates 21U-RNAs during spermatogenesis.  
733 *Curr Biol CB.* 2008 Jun 24;18(12):861–7.
- 734 57. Ding D, Liu J, Midic U, Wu Y, Dong K, Melnick A, et al. TDRD5 binds piRNA precursors and  
735 selectively enhances pachytene piRNA processing in mice. *Nat Commun.* 2018 Jan  
736 9;9(1):127.
- 737 58. Sun YH, Jiang F, Li XZ. Disruption of *Tdrd5* decouples the stepwise processing of long  
738 precursor transcripts during pachytene PIWI-interacting RNA biogenesis. *Biol Reprod.* 2018  
739 Oct 1;99(4):684–5.
- 740 59. Deng S, Wang J, Ma E, Zhang J, Xing S. TDRD5 Is Required for Spermatogenesis and  
741 Oogenesis in *Locusta migratoria*. *Insects.* 2022 Feb 24;13(3):227.
- 742 60. Bult CJ, Blake JA, Smith CL, Kadin JA, Richardson JE, Mouse Genome Database Group.  
743 Mouse Genome Database (MGD) 2019. *Nucleic Acids Res.* 2019 Jan 8;47(D1):D801–6.
- 744 61. Hutchison CA, Newbold JE, Potter SS, Edgell MH. Maternal inheritance of mammalian  
745 mitochondrial DNA. *Nature.* 1974 Oct;251(5475):536–8.
- 746 62. Wang QT, Piotrowska K, Ciemerych MA, Milenkovic L, Scott MP, Davis RW, et al. A  
747 Genome-Wide Study of Gene Activity Reveals Developmental Signaling Pathways in the  
748 Preimplantation Mouse Embryo. *Dev Cell.* 2004 Jan 1;6(1):133–44.
- 749 63. Castagnetti S, Ephrussi A. Orb and a long poly(A) tail are required for efficient oskar  
750 translation at the posterior pole of the *Drosophila* oocyte. *Development.* 2003 Mar  
751 1;130(5):835–43.
- 752 64. Richter JD. CPEB: a life in translation. *Trends Biochem Sci.* 2007 Jun;32(6):279–85.

- 753 65. Costa A, Wang Y, Dockendorff TC, Erdjument-Bromage H, Tempst P, Schedl P, et al. The  
754 Drosophila Fragile X Protein Functions as a Negative Regulator in the orb Autoregulatory  
755 Pathway. *Dev Cell*. 2005 Mar 1;8(3):331–42.
- 756 66. Wong LC, Schedl P. Cup Blocks the Precocious Activation of the Orb Autoregulatory Loop.  
757 *PLOS ONE*. 2011 Dec 2;6(12):e28261.
- 758 67. Doren MV, Williamson AL, Lehmann R. Regulation of zygotic gene expression in Drosophila  
759 primordial germ cells. *Curr Biol*. 1998 Feb 12;8(4):243–6.
- 760 68. Gratz SJ, Ukken FP, Rubinstein CD, Thiede G, Donohue LK, Cummings AM, et al. Highly  
761 specific and efficient CRISPR/Cas9-catalyzed homology-directed repair in Drosophila.  
762 *Genetics*. 2014 Apr;196(4):961–71.
- 763 69. Gonczy P, Matunis E, DiNardo S. bag-of-marbles and benign gonial cell neoplasm act in the  
764 germline to restrict proliferation during Drosophila spermatogenesis. *Development*. 1997  
765 Nov 1;124(21):4361–71.
- 766 70. Zimmerman SG, Peters NC, Altaras AE, Berg CA. Optimized RNA ISH, RNA FISH and protein-  
767 RNA double labeling (IF/FISH) in Drosophila ovaries. *Nat Protoc*. 2013 Nov;8(11):2158–79.
- 768 71. Zhang Z, Theurkauf WE, Weng Z, Zamore PD. Strand-specific libraries for high throughput  
769 RNA sequencing (RNA-Seq) prepared without poly(A) selection. *Silence*. 2012 Dec  
770 28;3(1):9.
- 771



# Figure 1

bioRxiv preprint doi: <https://doi.org/10.1101/2022.08.02.502436>; this version posted August 3, 2022. The copyright holder for this preprint (which was not certified by peer review) is the author/funder, who has granted bioRxiv a license to display the preprint in perpetuity. It is made available under aCC-BY 4.0 International license.

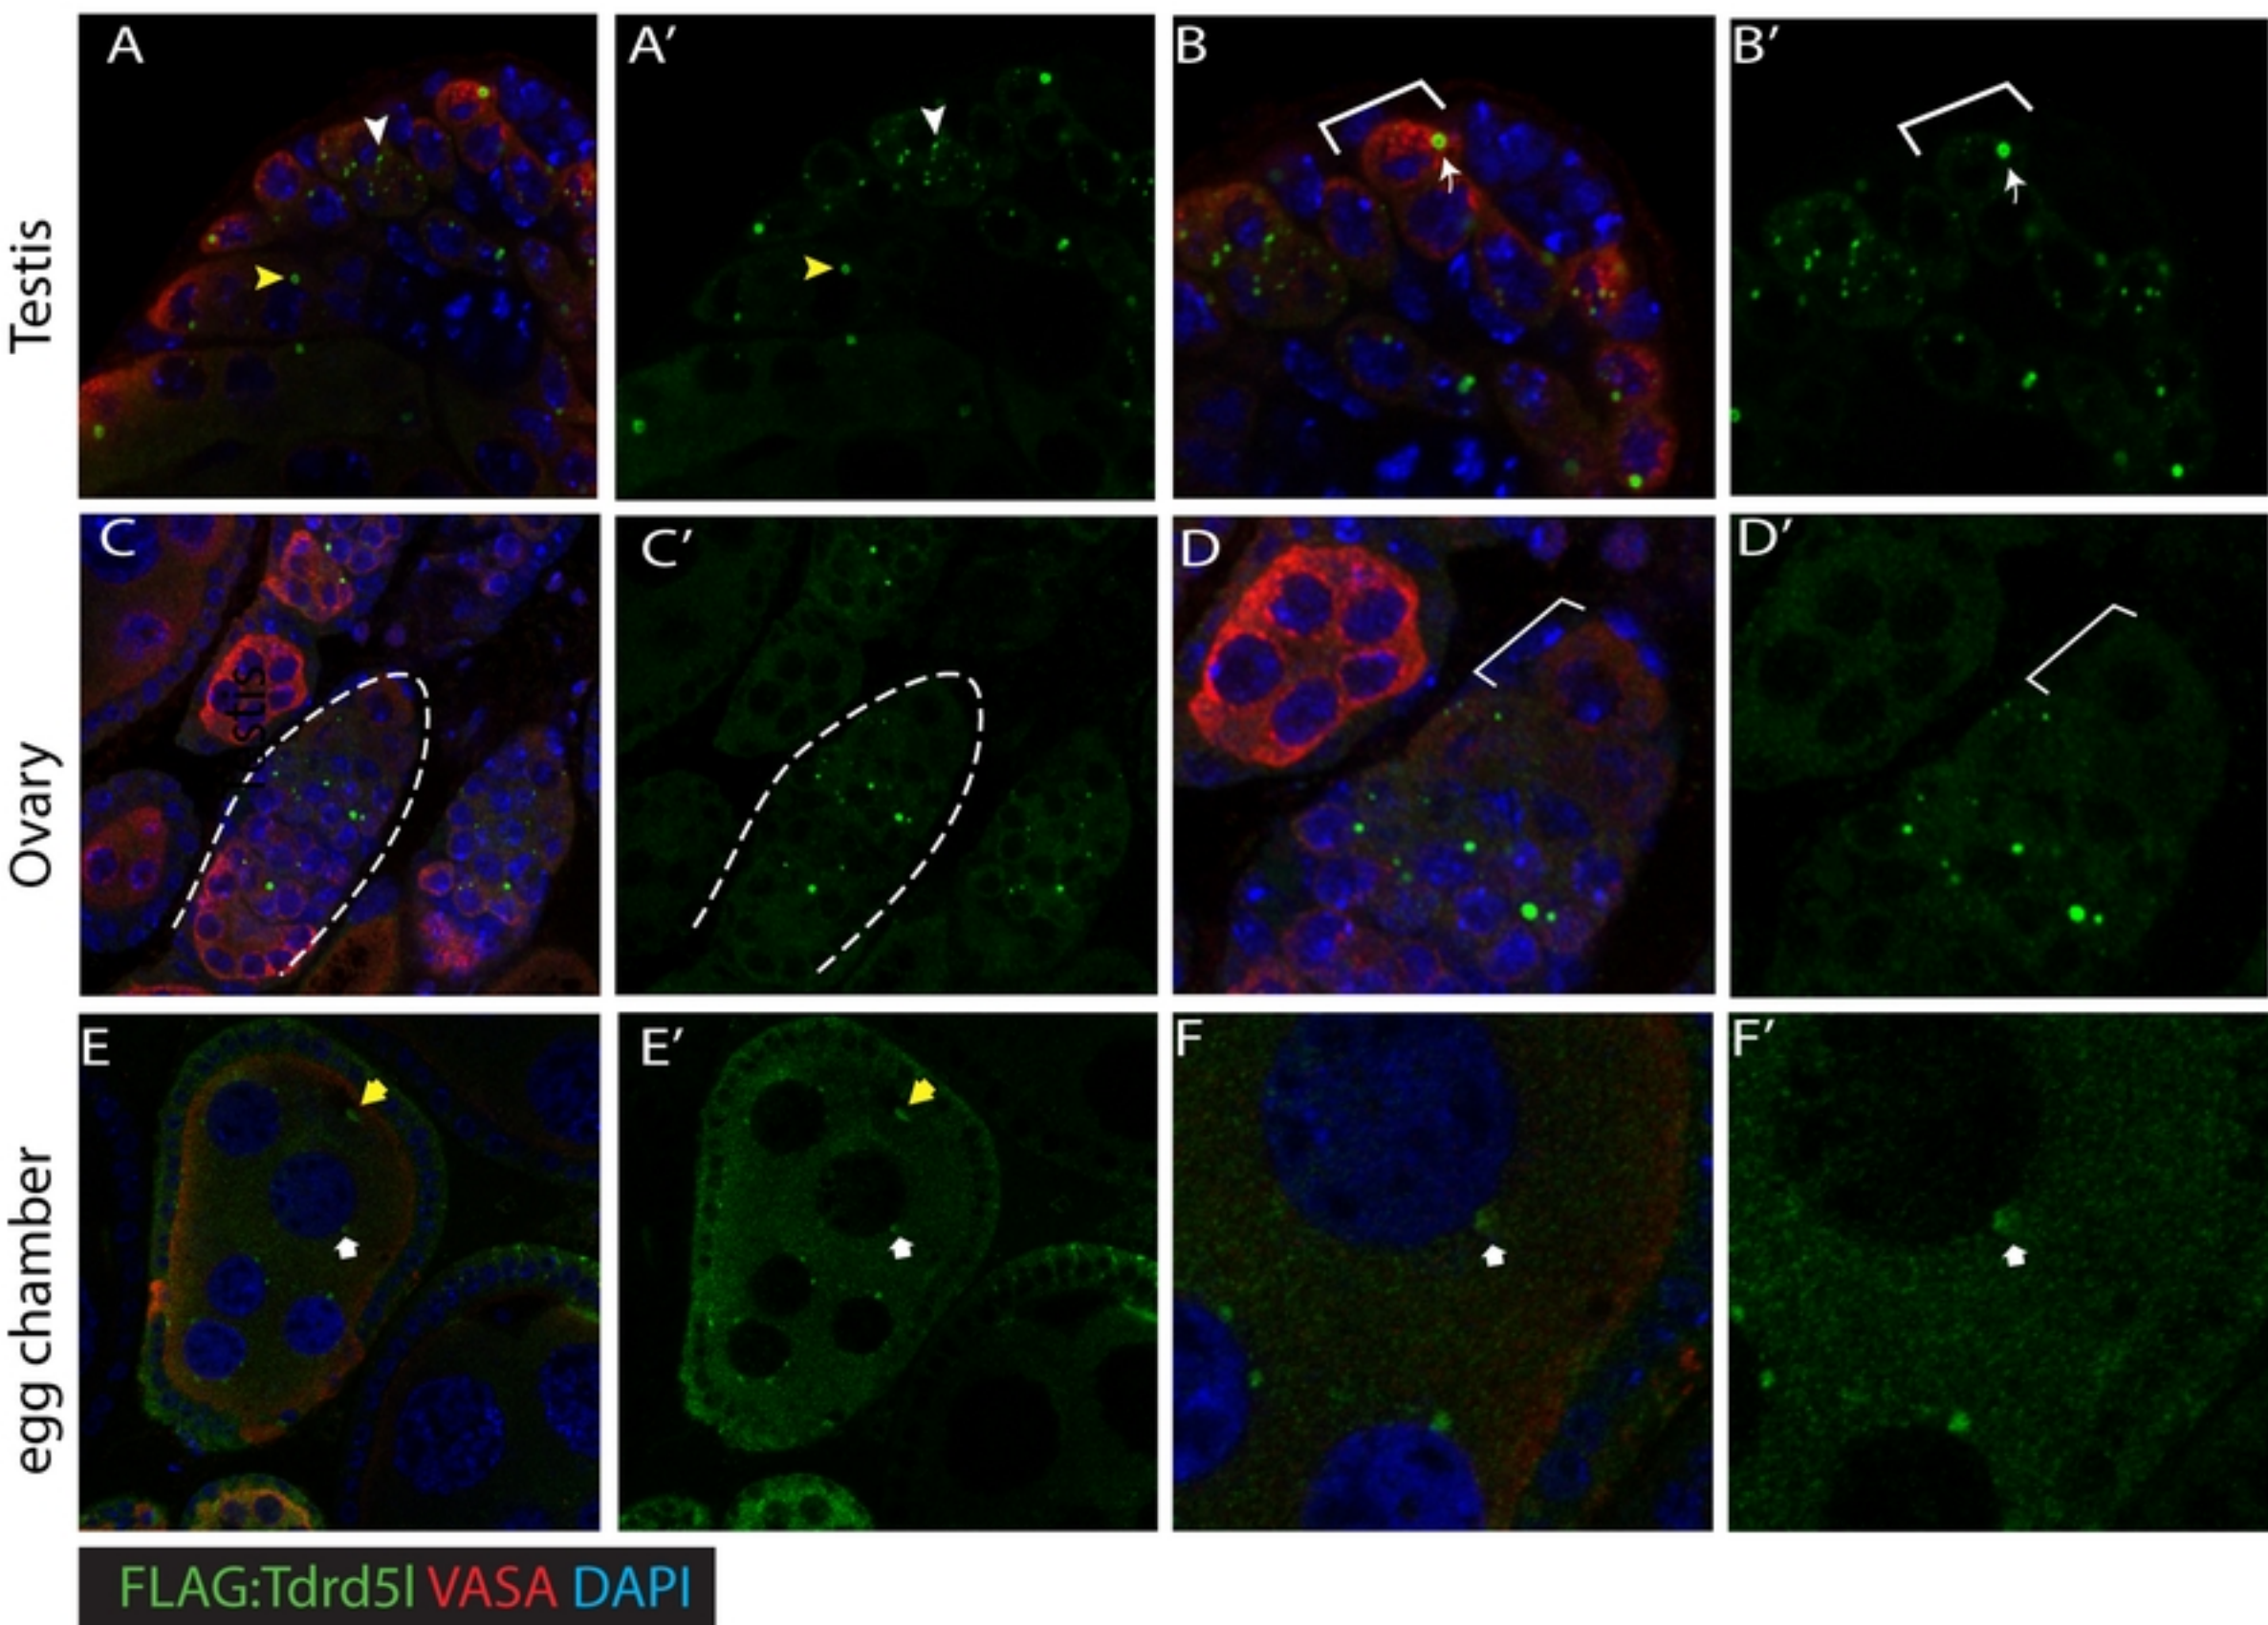

Figure 1



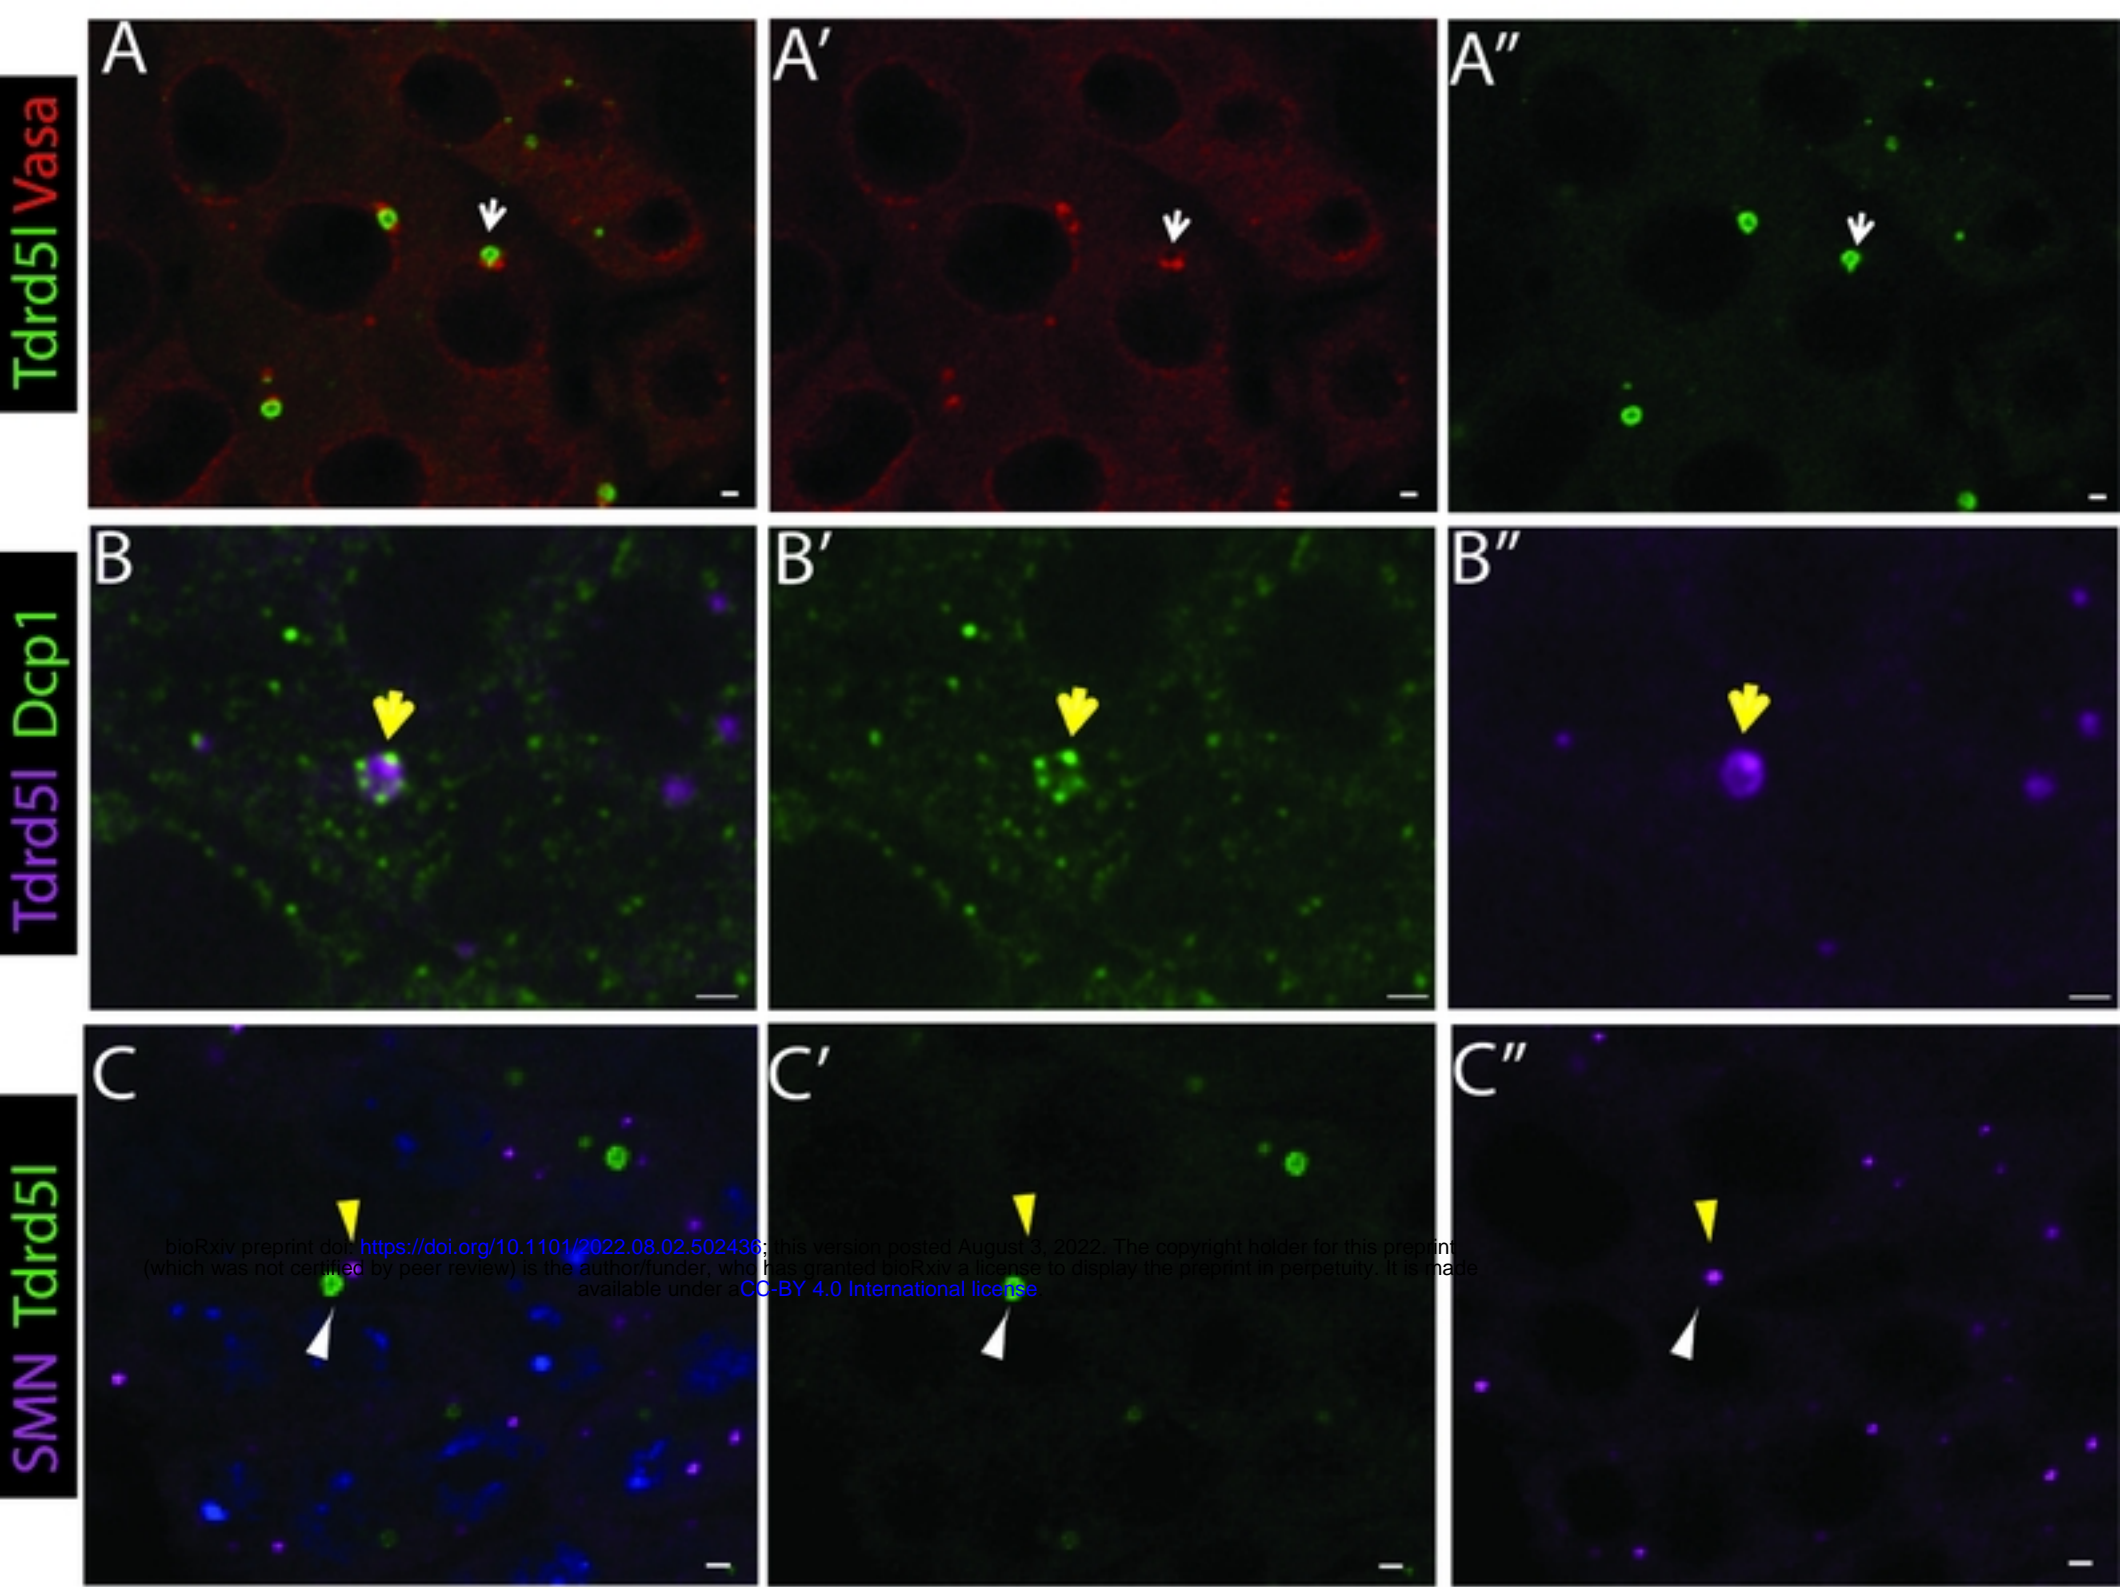

Figure 2



Figure 3

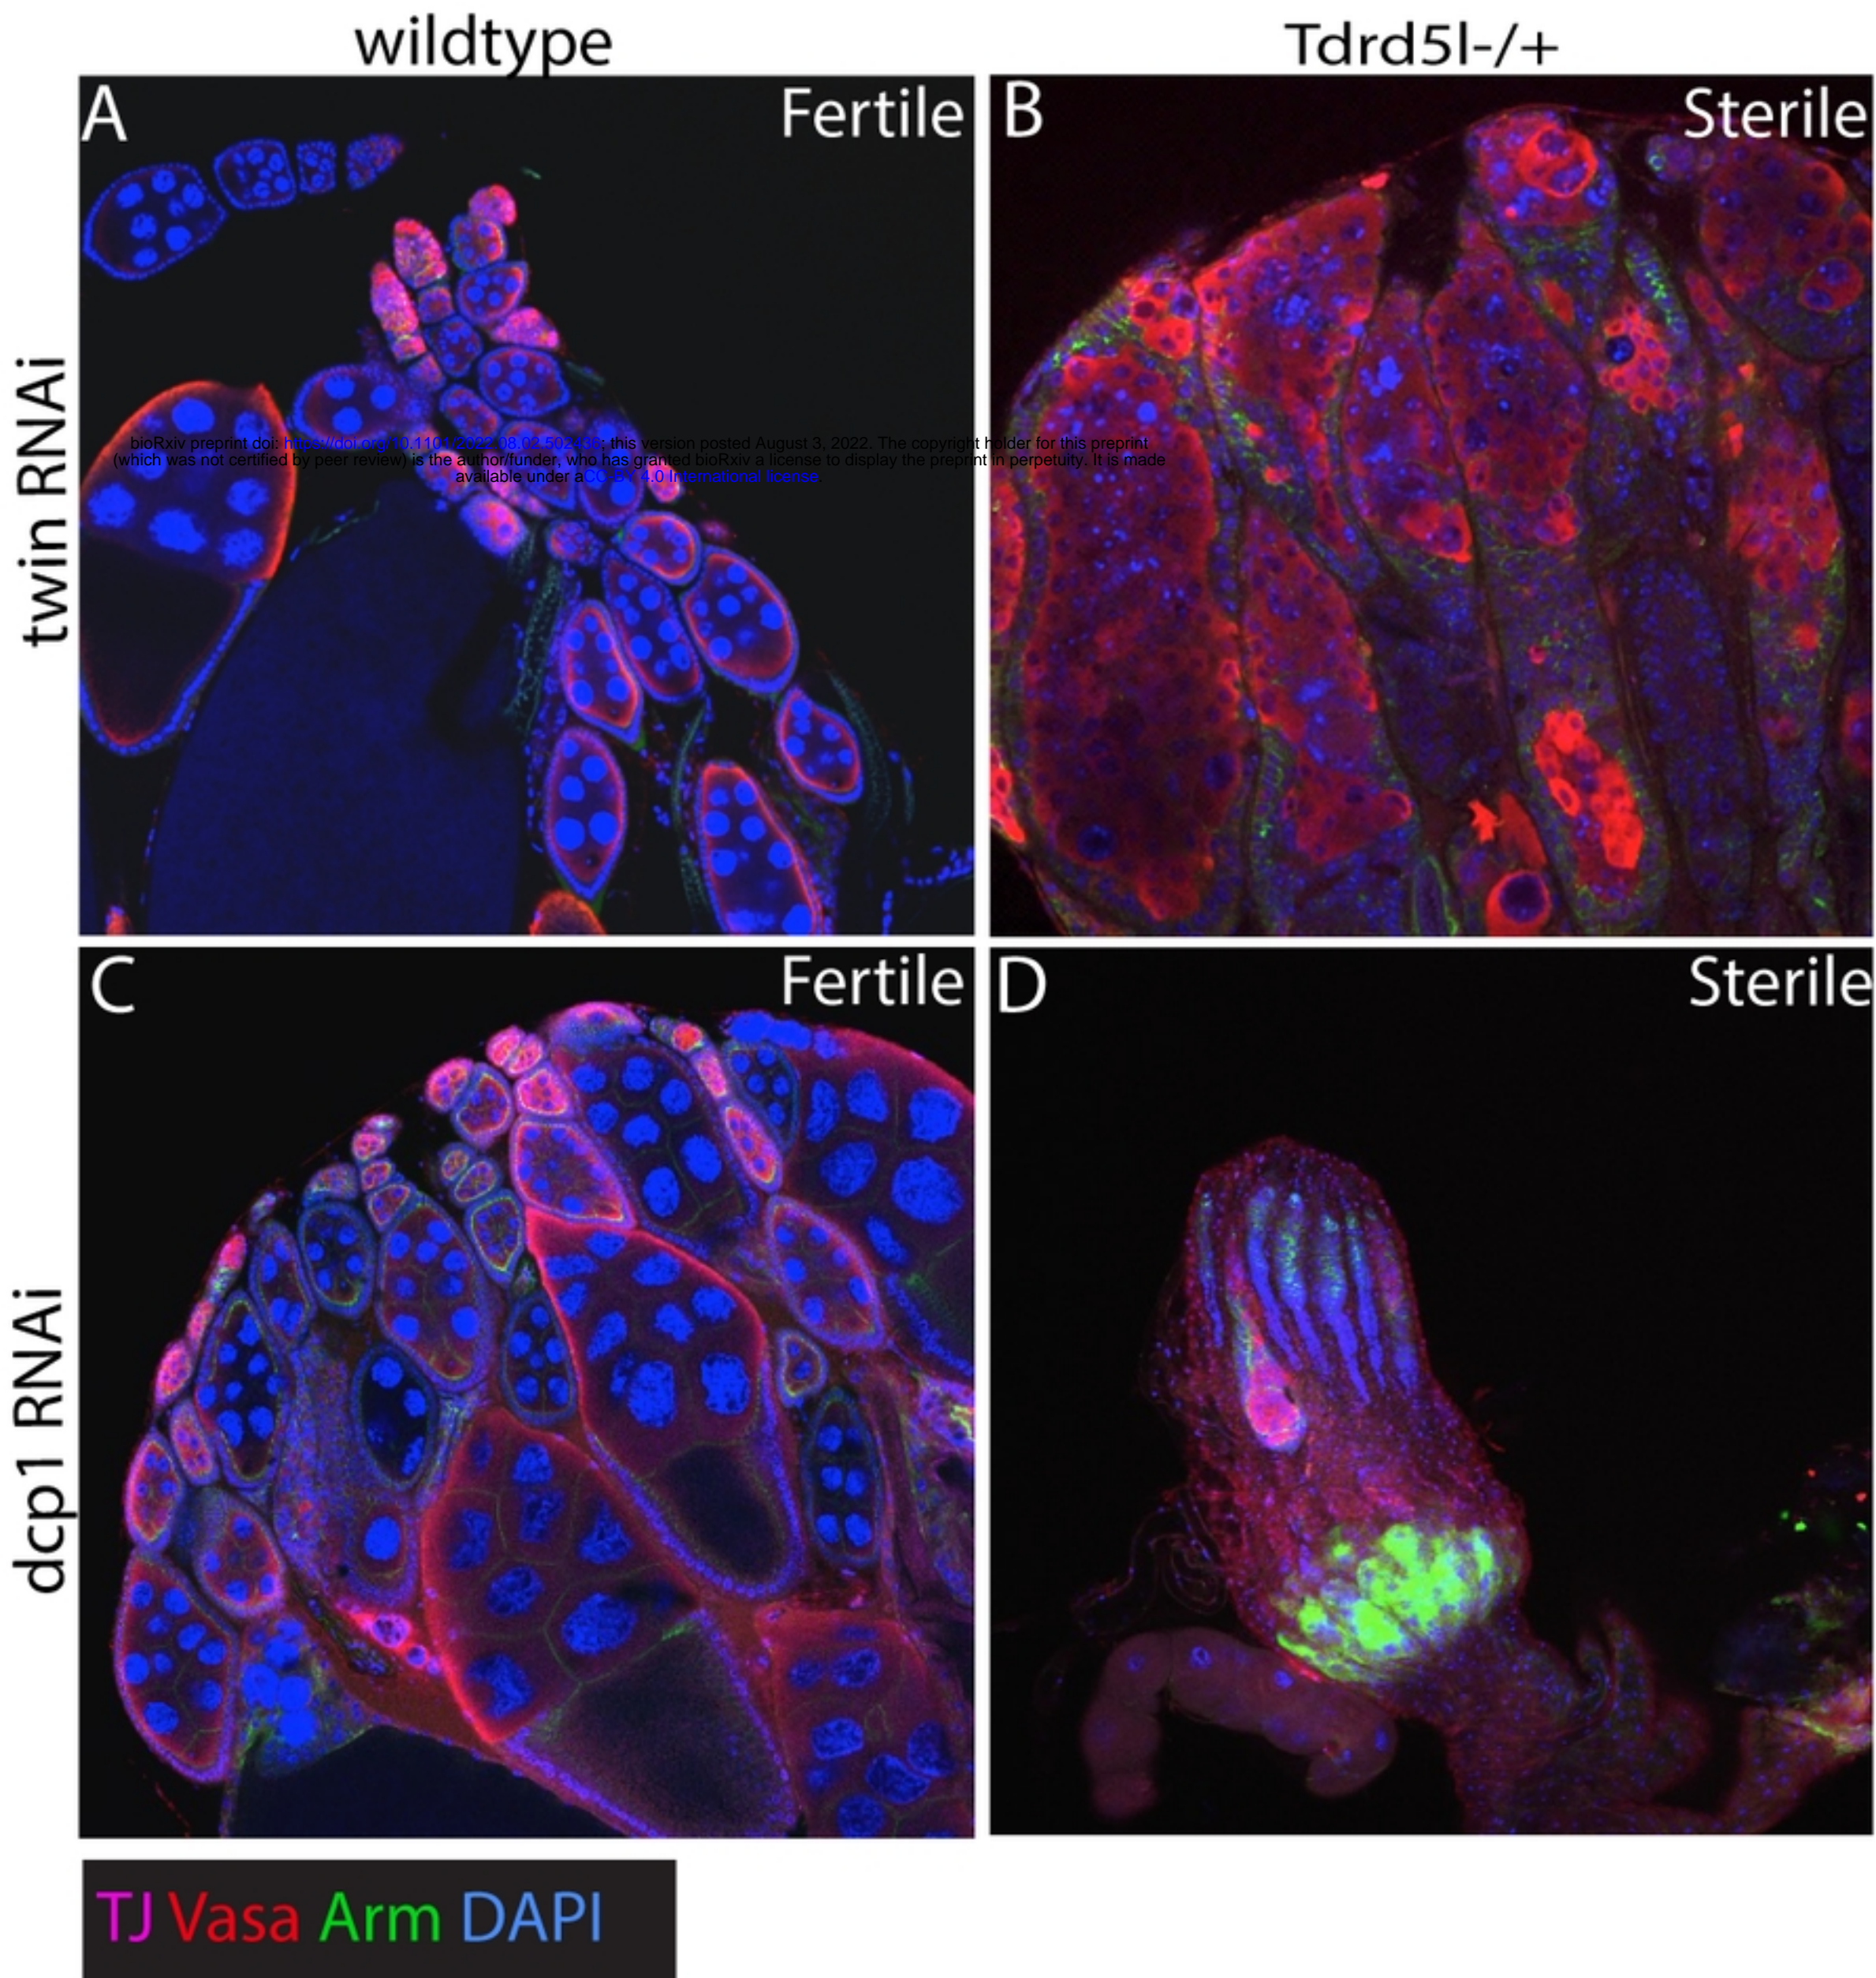

Figure 3





Figure 5

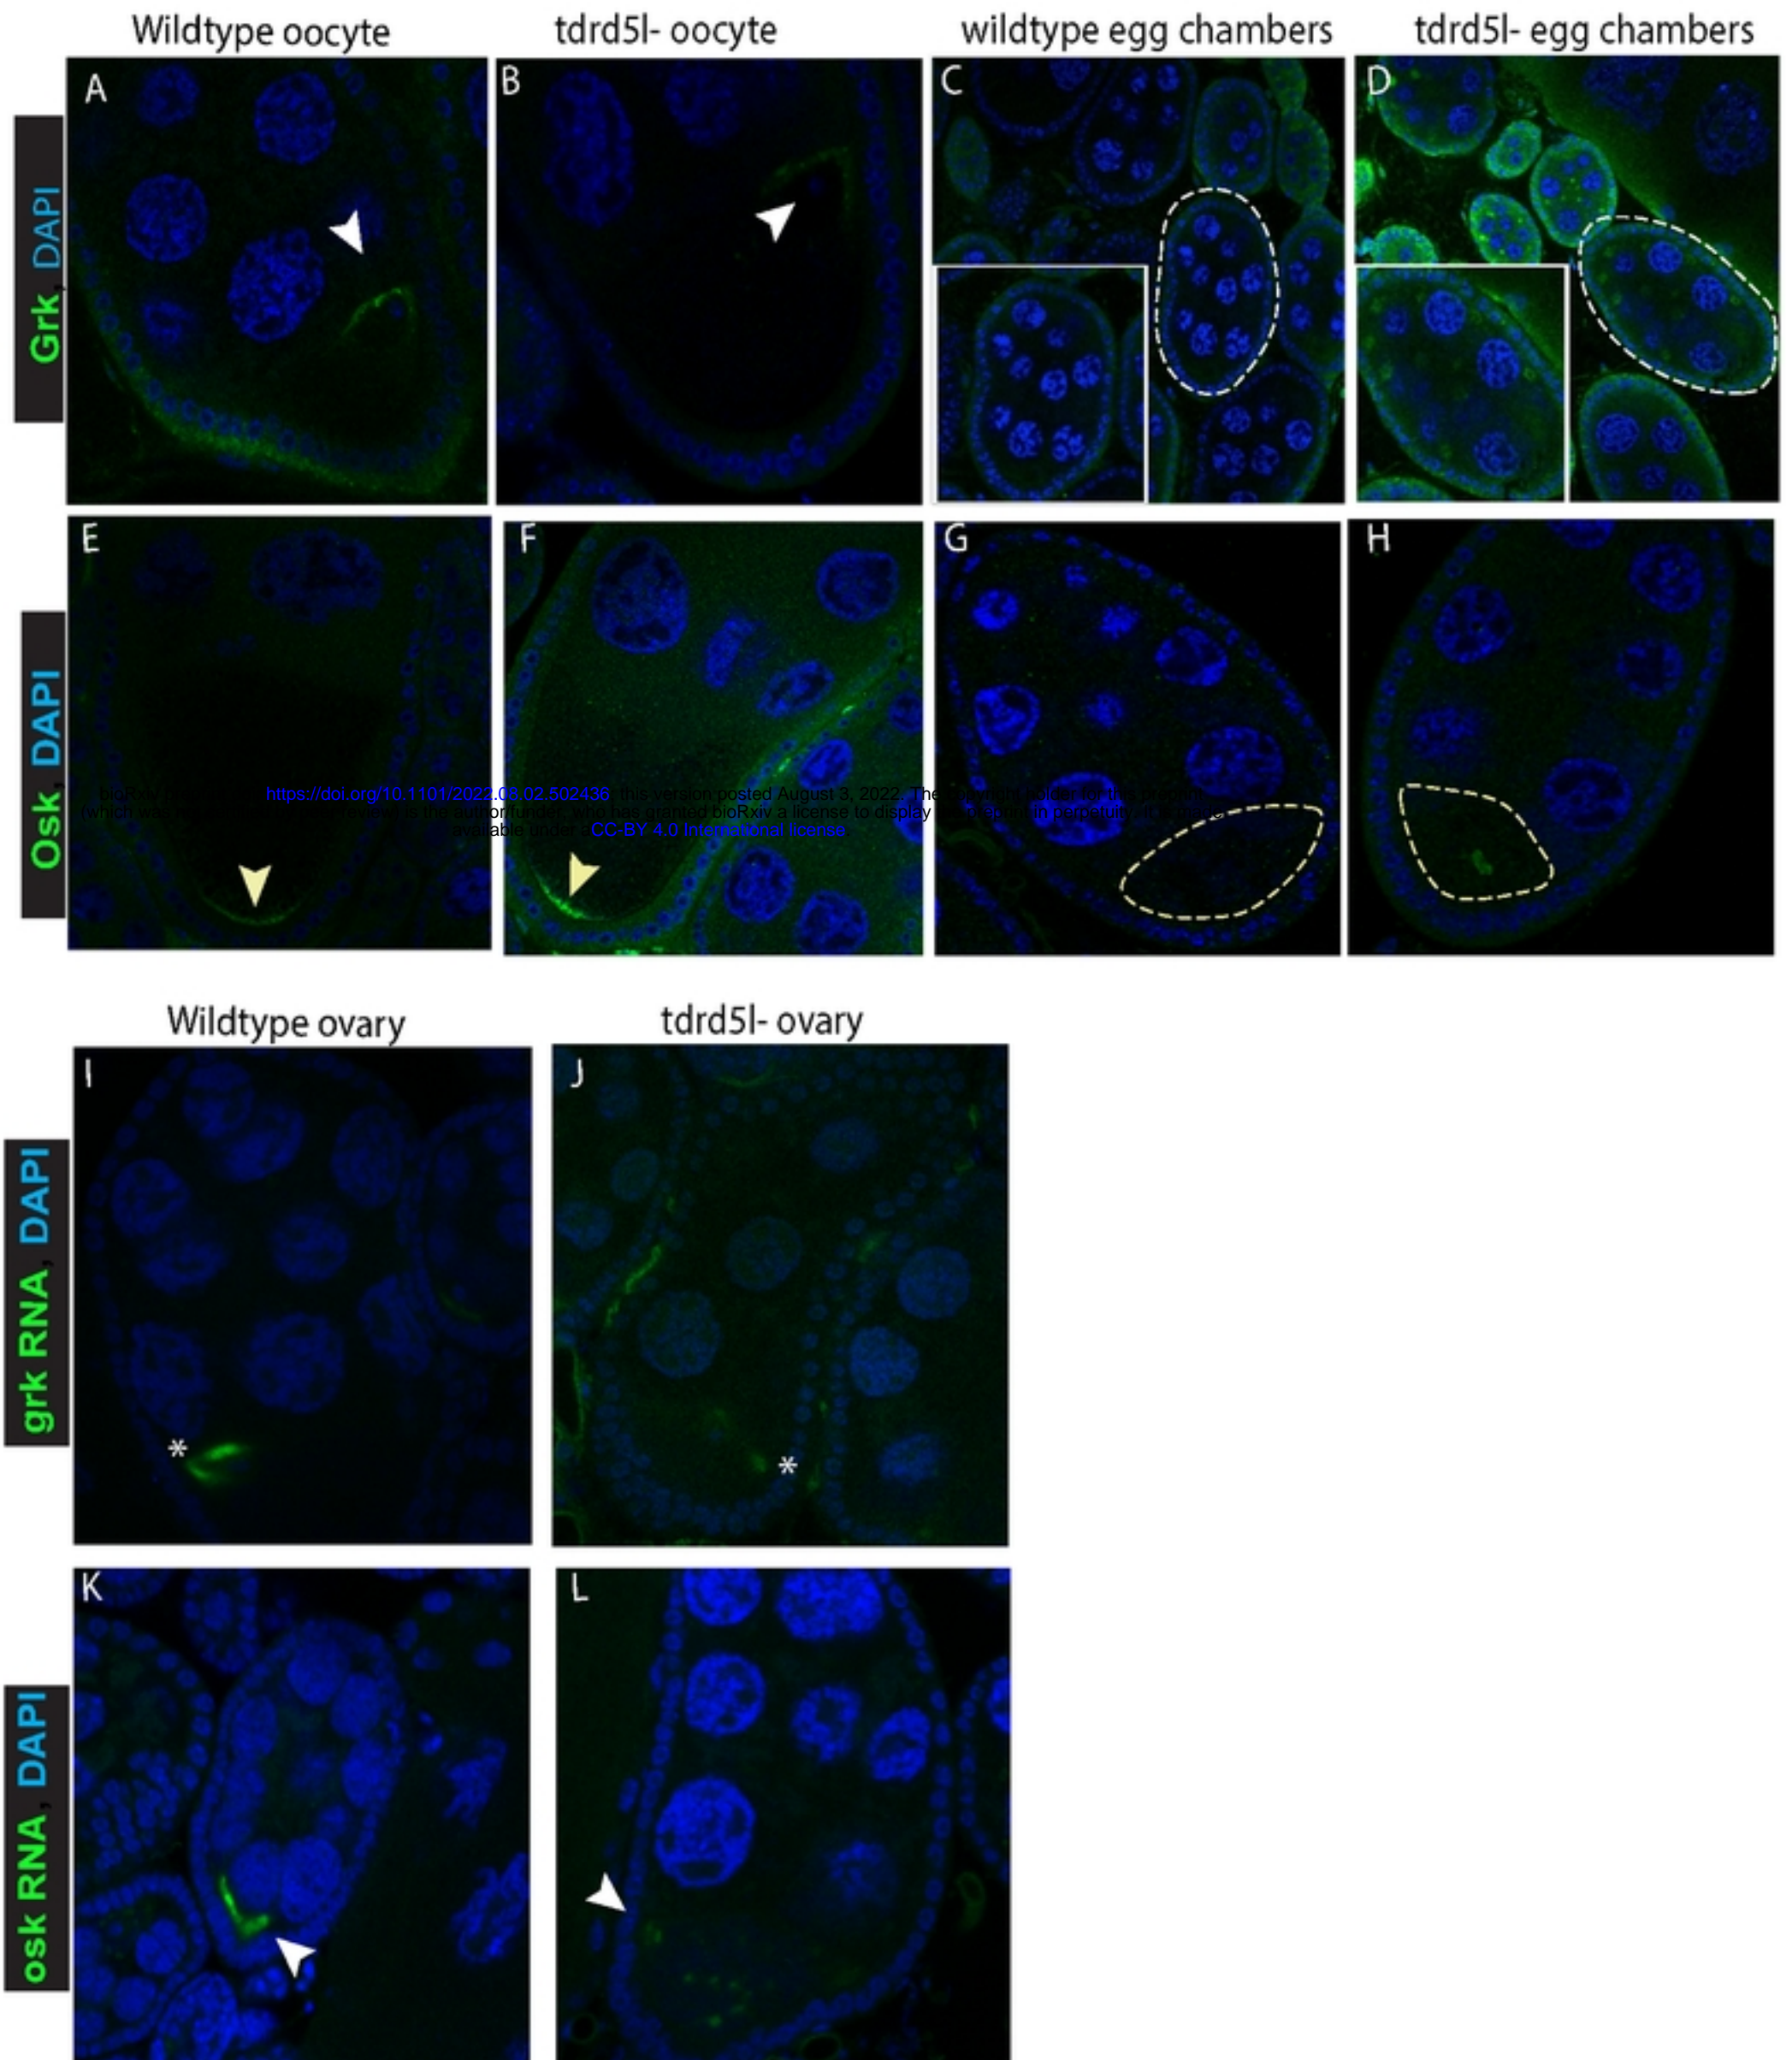

Figure 5



Figure 6

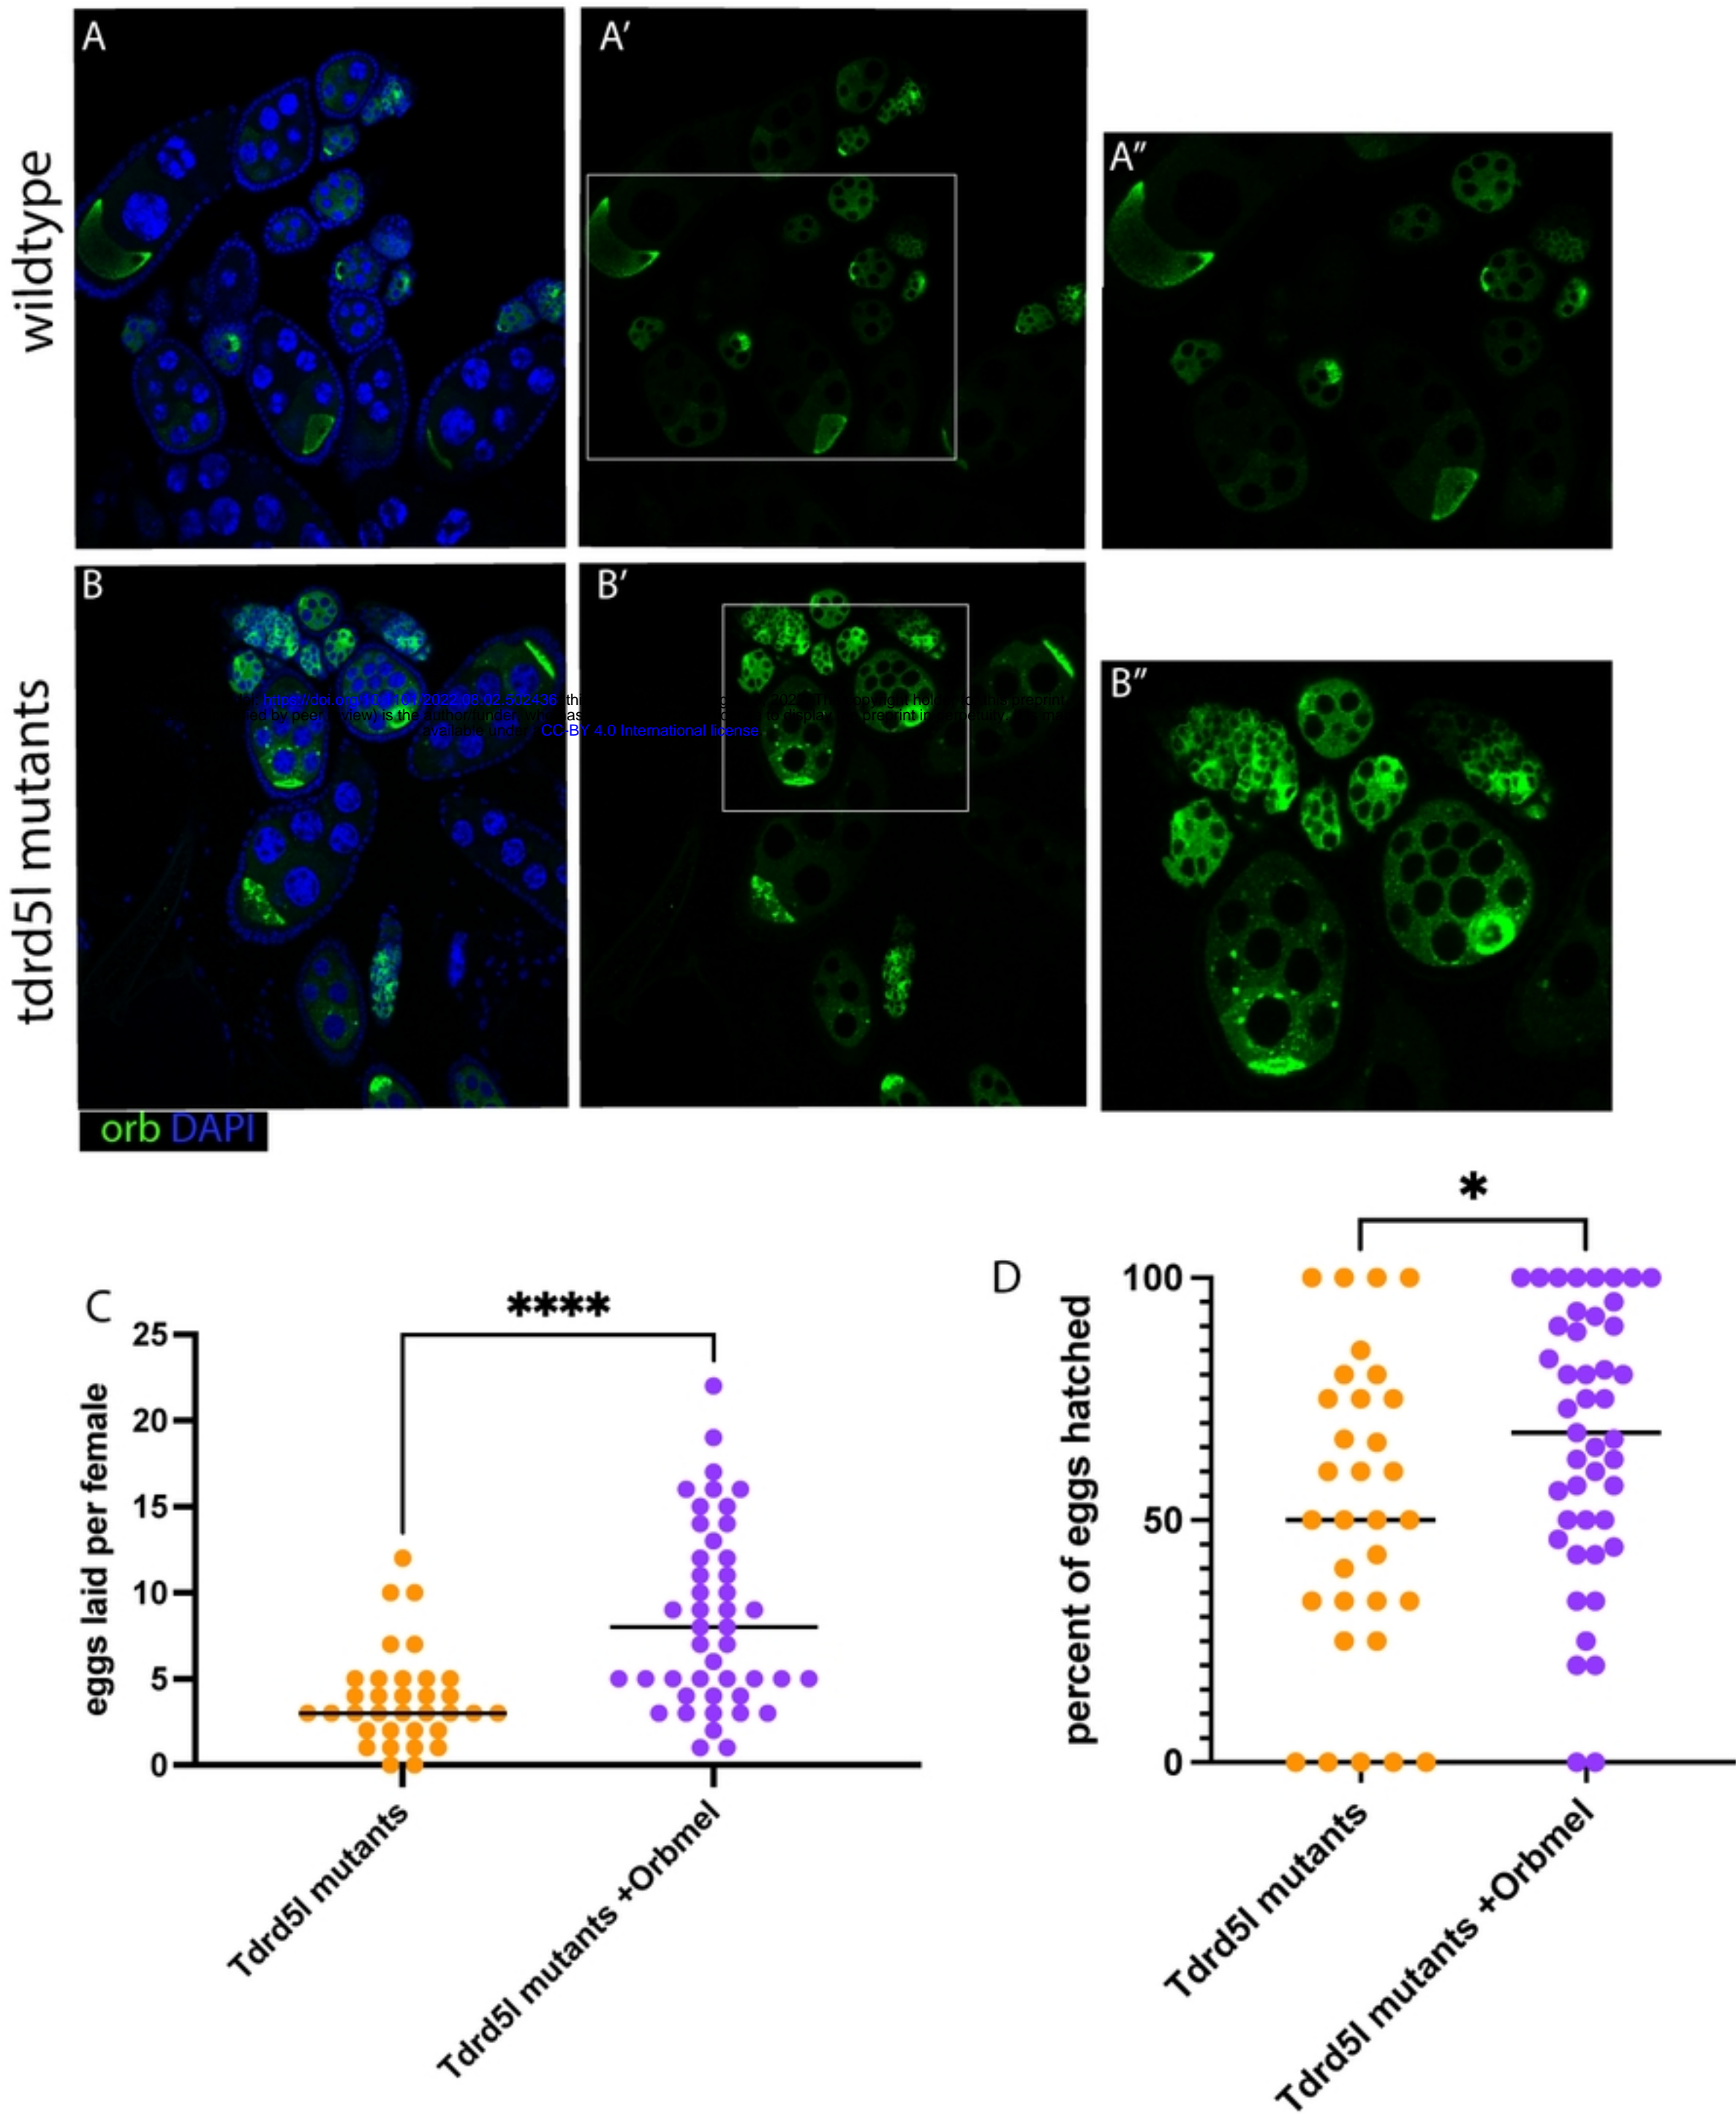

Figure 6
